# Supplementary material for: Narcissistic self-sorting of hydrogen-bonded dimeric capsules formed through self-assembly of flexible tripodal receptors in polar solvents
Source: Royal Society of Chemistry journal article supplement (doi:10.1039/c2cc33645f), 2012-01-01
Supplement: c2cc33645f.pdf [file c2cc33645f.pdf]

## Supporting Information

### **Narcissistic self-sorting of hydrogen-bonded dimeric capsules formed through self-assembly of flexible tripodal receptors in Polar Solvents**

**Ashutosh S. Singh and Shih-Sheng Sun\***

*Institute of Chemistry, Academia Sinica, 115 Nankang, Taipei, Taiwan,  
Republic of China*

*E-mail: sssun@chem.sinica.edu.tw*

- Fig. S1-S12** Synthetic procedure and spectral characterization of receptors.
- Fig. S13-S21**  $^1\text{H}$  NMR titration spectra of receptor **1-3** in DMSO- $d_6$  with  $\text{CDCl}_3$ , acetone- $d_6$  and  $\text{CD}_3\text{NO}_2$  to form their corresponding self-assembled capsule **1.1**, **2.2** and **3.3** respectively.
- Fig. S22-S29** HRESI mass spectra of self-assemble capsule **1.1**, **2.2** and **3.3** respectively.
- Fig. S30** Binding modes of self-assembled capsules formed by receptor **1**, **2** and **3**.
- Fig. S31-S33**  $^1\text{H}$  NMR (400 MHz, 30 °C) of two-component system in DMSO- $d_6$ .
- Fig. S34-S38** Two-component self-sorting.
- Fig. S39**  $^1\text{H}$  NMR (400 MHz, 30 °C) of three-component system in DMSO- $d_6$ .
- Fig. S40-S42** Three-component self-sorting.
- Fig. S30** Binding modes of self-assembled capsules formed by receptor **1**, **2** and **3**.

### Synthetic Scheme:

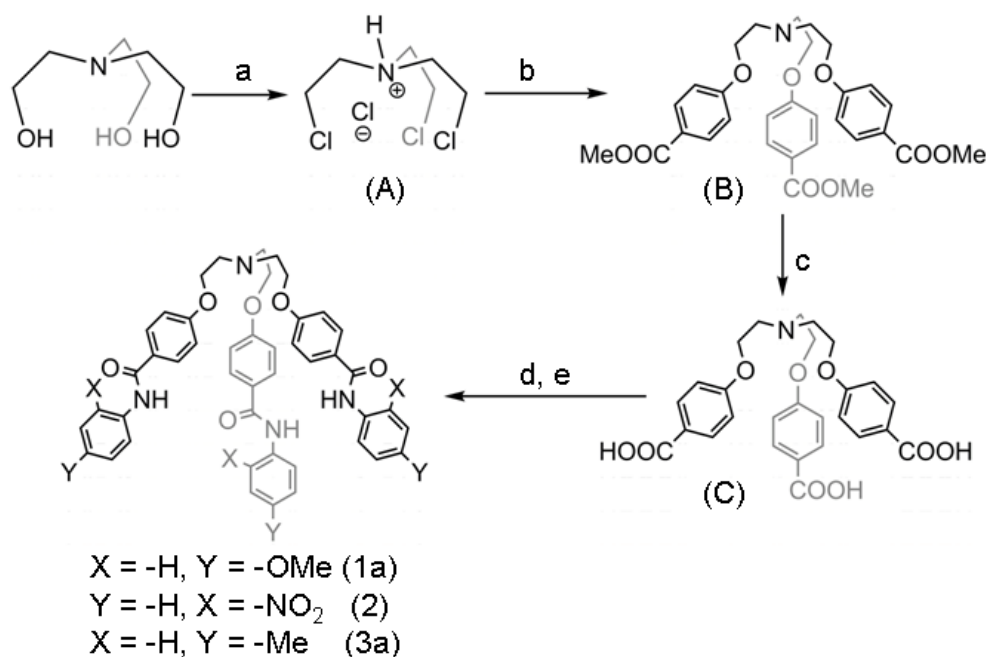

(a) SOCl<sub>2</sub>, CHCl<sub>3</sub>, 54%. (b) *p*-OH-C<sub>6</sub>H<sub>4</sub>COOMe, KOH, DMSO, 80 °C, 75%. (c) 5 N NaOH/MeOH (1:1, v/v), 100 °C, 12 h, dil HCl, 92%. (d) SOCl<sub>2</sub>, CH<sub>2</sub>Cl<sub>2</sub>, DMF (cat.), reflux, 2-3 h. (e) X-C<sub>6</sub>H<sub>4</sub>NH<sub>2</sub>, CH<sub>2</sub>Cl<sub>2</sub>, Et<sub>3</sub>N, reflux, 8 h

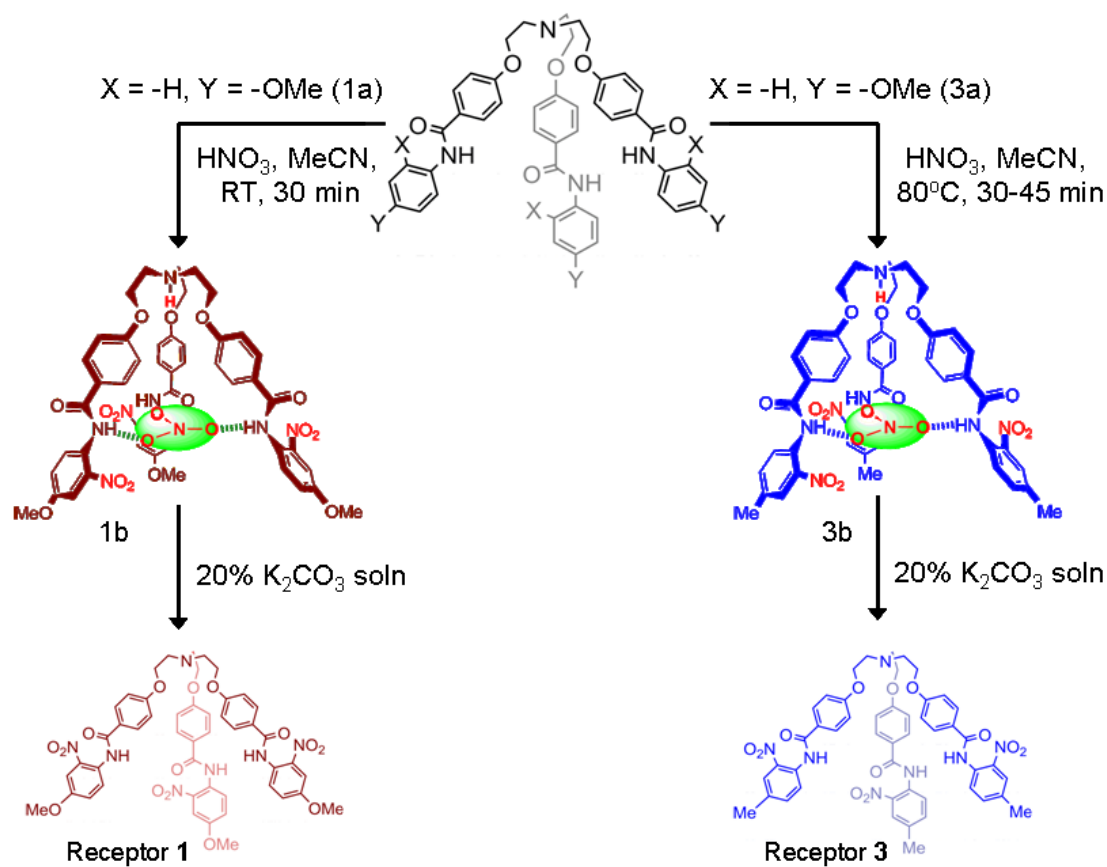

**General procedures for the synthesis of receptors 1–3.** Receptors were synthesized from previously reported tris(2-chloroethyl)amine hydrochloride<sup>1</sup> (**A**) by simple SN<sub>2</sub> substitution with 4-hydroxy methylbenzoate in DMSO followed by basic hydrolysis to yield corresponding triacid (**C**). Subsequent condensation of triacid with thionyl chloride in dichloromethane yielded corresponding acid chloride. Subsequently, the acid chloride solution in dichloromethane was slowly added to a mixture of the corresponding amino derivative and Et<sub>3</sub>N in dichloromethane and refluxed for 8-12 h. Solvent was removed under reduced pressure. Ice-cold water was added to the residue and stirred at room temperature for 2-3 h to precipitate the target compounds (**1a**, **2** and **3a**). The crude product was purified by flash chromatography with CHCl<sub>3</sub>/MeOH mixture solution as eluent to yield desired receptors. The desired receptors **1a**, **2** and **3a** were isolated in 95%, 70% and 90% yields respectively.

Nitrate complexes **1b** and **3b** were collected as precipitate after treating suspension of **1a** (and **3a**) in acetonitrile with 25% HNO<sub>3</sub> and stirring the mixture solution at room temperature (for **3b**, mixture was heated at 80 °C) for 30-45 min.

The suspension of nitrate complexes **1b** and **3b** in ethyl acetate was treated with 20% K<sub>2</sub>CO<sub>3</sub> solution and reaction mixture was stirred at room temperature for 1h. The precipitate was filtered and washed twice with cold water followed by diethyl ether to

get free receptor **1** (shiny yellow) and **3** (orange color solid) respectively in 87% and 93% yields.

**1a:** Gray color solid (yield 95%).  $^1\text{H}$  NMR (DMSO- $d_6$ , 400 MHz, 20 °C)  $\delta$  3.12 (t, 6H,  $J = 5.6$  Hz), 3.73 (s, 9H), 4.18 (t, 6H,  $J = 5.6$  Hz), 6.90 (d, 6H,  $J = 8.8$  Hz), 7.03 (d, 6H,  $J = 8.8$  Hz), 7.65 (d, 6H,  $J = 8.8$  Hz), 7.93 (d, 6H,  $J = 8.8$  Hz), 9.96 (s, 3H).  $^{13}\text{C}$  NMR (DMSO- $d_6$ , 100 MHz, 20 °C)  $\delta$  53.5, 55.2, 66.8, 113.7, 114.1, 122.0, 127.0, 129.4, 132.4, 155.4, 161.0, 164.5. HRESIMS  $m/z$  825.3494 (calcd  $m/z$  825.3500 for  $[\text{M}+\text{H}]^+$ ).

**1b:** Orange color solid (yield 92%).  $^1\text{H}$  NMR (DMSO- $d_6$ , 400 MHz, 20 °C)  $\delta$  3.86 (s, 9H), 3.92 (s, 6H), 4.58 (s, 6H), 7.15 (d, 6H,  $J = 8.8$  Hz), 7.35 (d, 3H,  $J = 9.2$  Hz), 7.52 (s, 3H), 7.64 (d, 3H,  $J = 9.2$  Hz), 7.98 (d, 6H,  $J = 8.8$  Hz) 10.44 (s, 3H).  $^{13}\text{C}$  NMR (DMSO- $d_6$ , 100 MHz, 20 °C)  $\delta$  53.3, 56.1, 62.7, 109.2, 114.6, 120.2, 124.5, 126.6, 128.0, 129.7, 143.9, 156.4, 160.5, 164.4. HRESIMS  $m/z$  1021.2855 (calcd  $m/z$  1021.2852 for  $[\text{M}-\text{H}]^-$ ).

**Receptor 1:** Deep yellow solid (yield 87%).  $^1\text{H}$  NMR (DMSO- $d_6$ , 400 MHz, 20 °C)  $\delta$  3.13 (t, 6H,  $J = 5.2$  Hz), 3.85 (s, 9H), 4.20 (t, 6H,  $J = 5.2$  Hz), 7.08 (d, 6H,  $J = 8.8$  Hz), 7.33 (d, 3H,  $J = 9$  Hz), 7.51 (s, 3H), 7.65 (d, 3H,  $J = 8.8$  Hz), 7.92 (d, 6H,  $J = 8.8$  Hz), 10.39 (s, 3H).  $^{13}\text{C}$  NMR (DMSO- $d_6$ , 100 MHz, 20 °C)  $\delta$  53.4, 56.0, 66.9, 109.1, 114.3, 120.2, 124.6, 125.7, 127.7, 129.6, 143.6, 156.1, 161.5, 164.6. HRESIMS  $m/z$  960.3060 (calcd  $m/z$  960.3052 for  $[\text{M}+\text{H}]^+$ ).

**Self-assembled capsule 1.1:**  $^1\text{H}$  NMR ( $\text{CDCl}_3$ , 400 MHz, 20 °C)  $\delta$  3.18 (t, 6H,  $J = 5.2$  Hz), 3.83 (s, 9H), 4.16 (t, 6H,  $J = 5.2$  Hz), 6.93 (d, 6H,  $J = 8.8$  Hz), 7.21 (d, 3H,  $J = 9.2$  Hz), 7.64 (s, 3H), 7.86 (d, 6H,  $J = 8.8$  Hz), 8.80 (d, 3H,  $J = 9.2$  Hz), 10.97 (s, 3H).  $^{13}\text{C}$  NMR ( $\text{CDCl}_3$ , 100 MHz, 20 °C)  $\delta$  54.6, 56.1, 67.5, 108.7, 114.9, 123.7, 123.9, 126.7, 129.5, 129.6, 137.0, 154.9, 162.3, 165.1. HRESIMS  $m/z$  1942.5861 (calcd  $m/z$  1942.5879 for  $[\text{M}+\text{Na}]^+$ ).

**Receptor 2:** Yellow solid (yield 70%).  $^1\text{H}$  NMR ( $\text{DMSO}-d_6$ , 400 MHz, 20 °C)  $\delta$  3.13 (t, 6H,  $J = 5.2$  Hz), 4.21 (t, 6H,  $J = 5.2$  Hz), 7.10 (d, 6H,  $J = 8.8$  Hz), 7.38 (t, 3H,  $J = 7.6$  Hz), 7.73 (t, 3H,  $J = 7.6$  Hz), 7.84 (d, 3H,  $J = 8.0$  Hz), 7.94 (d, 6H,  $J = 8.8$  Hz), 8.00 (d, 3H,  $J = 8.0$  Hz), 10.63 (s, 3H).  $^{13}\text{C}$  NMR ( $\text{DMSO}-d_6$ , 100 MHz, 20 °C)  $\delta$  53.4, 66.9, 114.4, 124.9, 125.1, 125.5, 129.7, 132.0, 134.0, 142.3, 161.7, 164.6. HRESIMS  $m/z$  870.2739 (calcd  $m/z$  870.2735 for  $[\text{M}+\text{H}]^+$ ).

**Self-assembled capsule 2.2:**  $^1\text{H}$  NMR ( $\text{CDCl}_3$ , 400 MHz, 20 °C)  $\delta$  3.28 (s, 6H), 4.24 (s, 6H), 6.96 (d, 6H,  $J = 8.8$  Hz), 7.14 (t, 3H,  $J = 8.0$  Hz), 7.63 (t, 3H,  $J = 8.0$  Hz), 7.89 (d, 6H,  $J = 8.8$  Hz), 8.21 (d, 3H,  $J = 8.4$  Hz), 8.91 (d, 3H,  $J = 8.4$  Hz), 11.23 (s, 3H).  $^{13}\text{C}$  NMR ( $\text{DMSO}-d_6$ , 100 MHz, 20 °C)  $\delta$  54.5, 67.0, 114.9, 122.2, 123.2, 126.0, 126.7, 129.6, 135.8, 136.3, 136.4, 162.2, 165.2. HRESIMS  $m/z$  1739.5383 (calcd  $m/z$  1739.5392 for  $[\text{M}+\text{H}]^+$ ).

**3a:** White solid (yield 90%).  $^1\text{H}$  NMR ( $\text{DMSO}-d_6$ , 400 MHz, 20 °C)  $\delta$  2.27 (s, 9H), 3.12 (t, 6H,  $J = 5.2$  Hz), 4.18 (t, 6H,  $J = 5.2$  Hz), 7.04 (d, 6H,  $J = 8.8$  Hz), 7.13 (d, 6H,  $J = 8.4$  Hz), 7.65 (d, 6H,  $J = 8.4$  Hz), 7.95 (d, 6H,  $J = 8.8$  Hz), 10.01 (s, 3H).  $^{13}\text{C}$

NMR (DMSO-*d*<sub>6</sub>, 100 MHz, 20 °C) δ 20.5, 53.5, 66.8, 114.0, 120.4, 127.0, 128.9, 129.5, 132.3, 136.8, 161.1, 164.6. HRESIMS *m/z* 799.3467 (calcd *m/z* 799.3472 for [M+Na]<sup>+</sup>).

**3b**: Yellow solid (yield 91%). <sup>1</sup>H NMR (DMSO-*d*<sub>6</sub>, 400 MHz, 20 °C) δ 2.35 (s, 9H), 3.91 (s, 6H), 4.57 (s, 6H), 7.12 (d, 6H, *J* = 8.8 Hz), 7.52 (d, 3H, *J* = 7.6 Hz), 7.65 (d, 3H, *J* = 8.4 Hz), 7.80 (s, 3H), 7.95 (d, 6H, *J* = 8.4 Hz), 10.57 (s, 3 H). <sup>13</sup>C NMR (DMSO-*d*<sub>6</sub>, 100 MHz, 20 °C) δ 20.2, 53.5, 62.8, 114.8, 125.0, 126.0, 126.7, 129.5, 129.9, 134.8, 135.6, 142.7, 160.7, 164.8. HRESIMS *m/z* 973.3002 (calcd *m/z* 973.3004 for [M-H]<sup>-</sup>).

**Receptor 3**: Orange solid (yield 93%). <sup>1</sup>H NMR (DMSO-*d*<sub>6</sub>, 400 MHz, 20 °C) δ 2.38 (s, 9H), 3.13 (t, 6H, *J* = 5.6 Hz), 4.20 (t, 6H, 5.6 Hz), 7.08 (d, 6H, *J* = 8.8 Hz), 7.53 (s, 3H, *J* = 8.0 Hz), 7.69 (d, 3 H, *J* = 8.0 Hz), 7.83 (s, 3H), 7.91 (d, 6H, *J* = 8.8 Hz), 10.50 (s, 3 H). <sup>13</sup>C NMR (DMSO-*d*<sub>6</sub>, 100 MHz, 20 °C) δ 20.0, 53.3, 62.7, 114.6, 124.8, 125.8, 126.5, 129.3, 129.7, 134.6, 135.4, 142.5, 160.5, 164.5. HRFABMS *m/z* 912.3196 (calcd *m/z* 912.3204 for [M+H]<sup>+</sup>).

**Self-assembled capsule 3.3**: <sup>1</sup>H NMR (CDCl<sub>3</sub>, 400 MHz, 20 °C) δ 2.37 (s, 9H), 3.20 (s, 6H), 4.17 (s, 6H), 6.95 (s, 6H), 7.46 (s, 3H), 7.89 (s, 6 H), 8.01 (s, 3H), 8.80 (s, 3H), 11.13 (s, 3H). <sup>13</sup>C NMR (CDCl<sub>3</sub>, 100 MHz, 20 °C) δ 20.8, 54.6, 67.5, 114.9,

122.2, 125.8, 126.7, 129.6, 133.5, 136.4, 137.3, 162.3, 165.2. HRESIMS  $m/z$   
1846.6067 (calcd  $m/z$  1846.6184 for  $[M+Na]^+$ ).

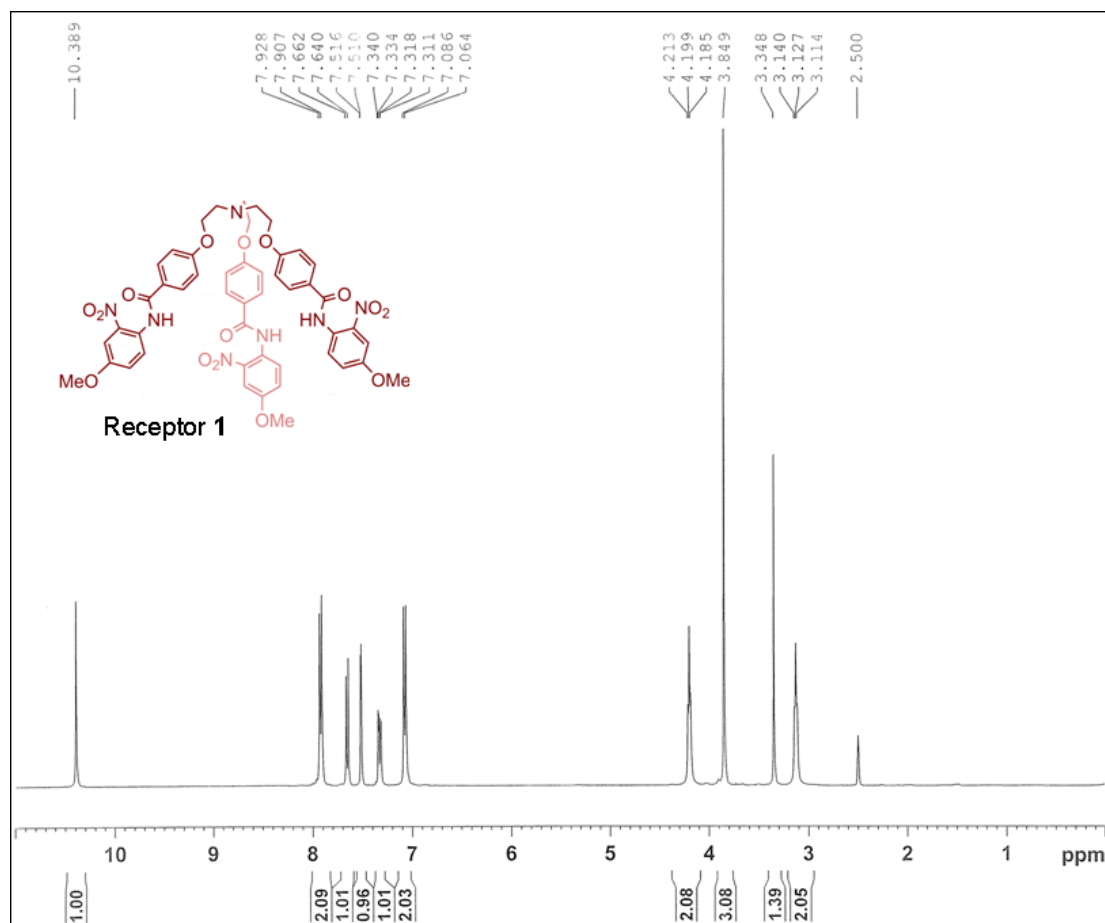

**Fig. S1**  $^1\text{H}$  NMR (400 MHz,  $\text{DMSO-}d_6$ , 20 °C) spectrum of receptor **1**.

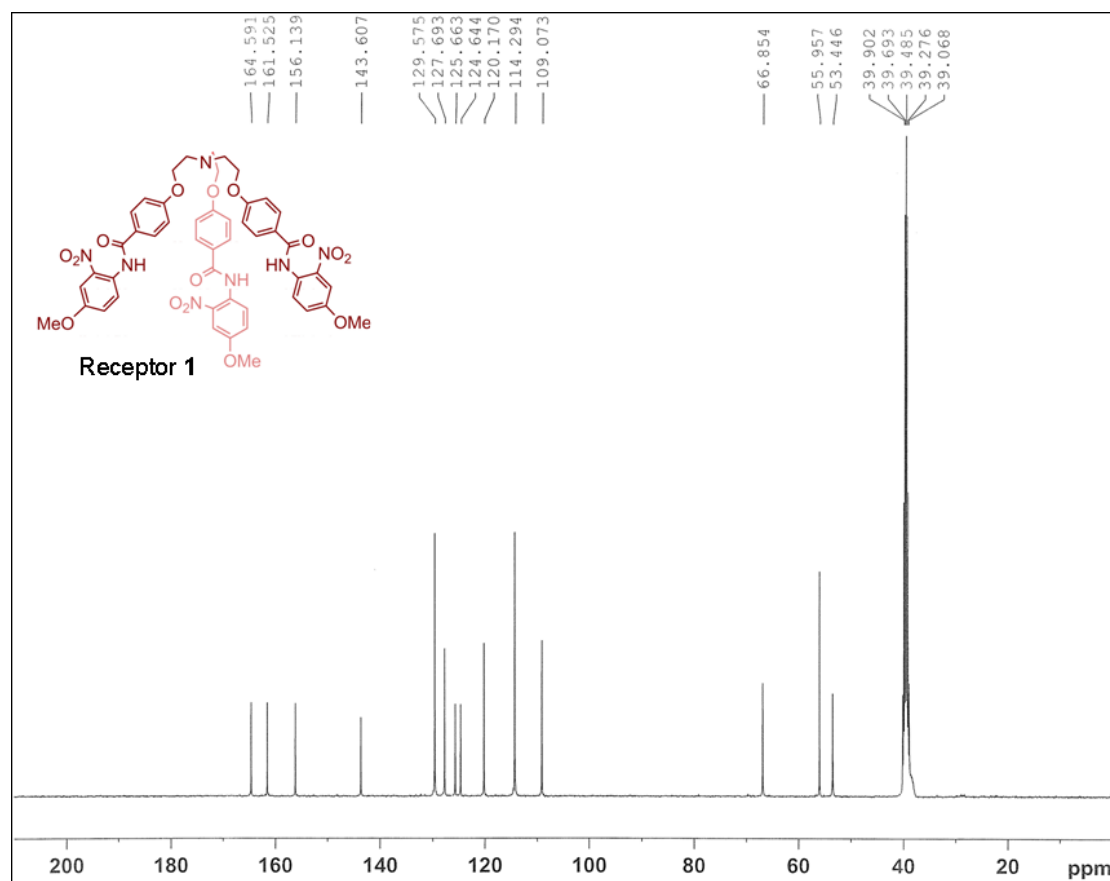

**Fig. S2**  $^{13}\text{C}$  NMR (100 MHz,  $\text{DMSO-}d_6$ , 20 °C) spectrum of receptor 1.



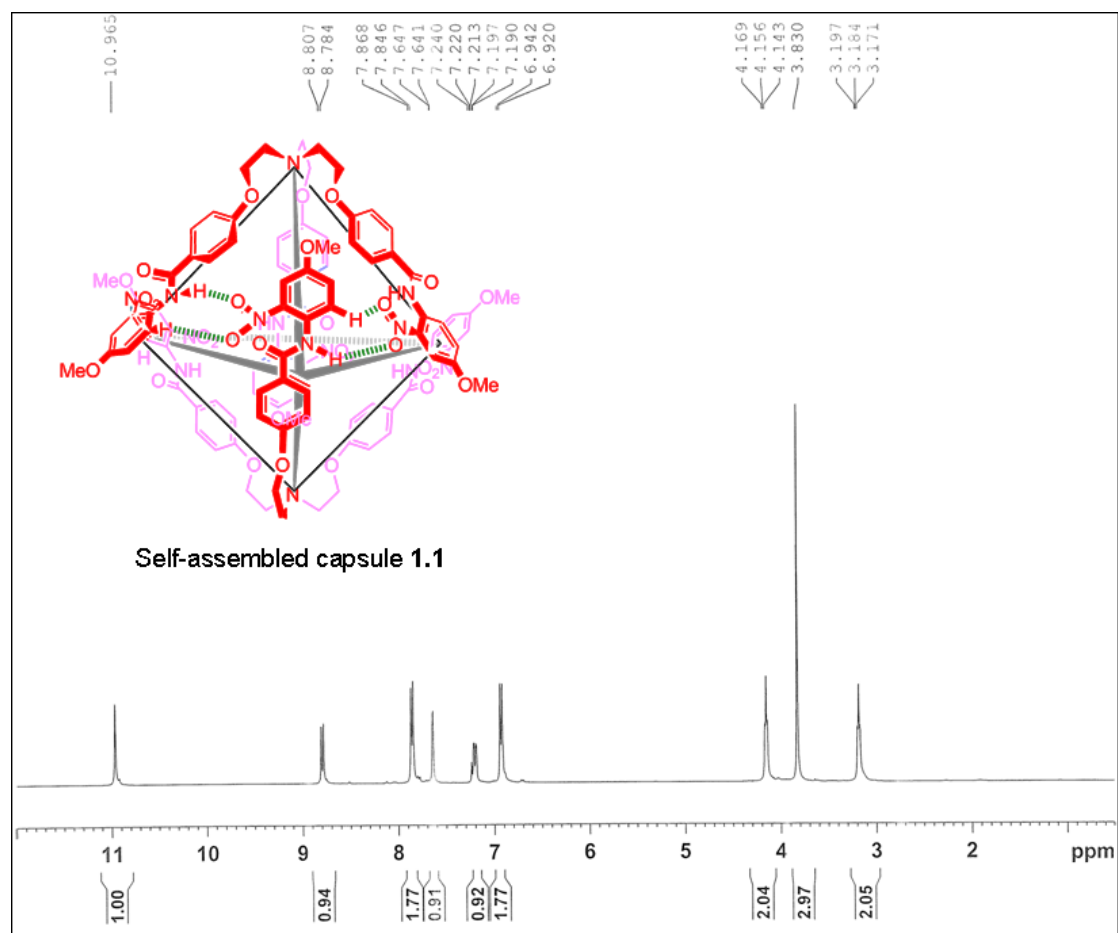

**Fig. S3** <sup>1</sup>H NMR (400 MHz, CDCl<sub>3</sub>, 20 °C) spectrum of self-assembled capsule **1.1**.

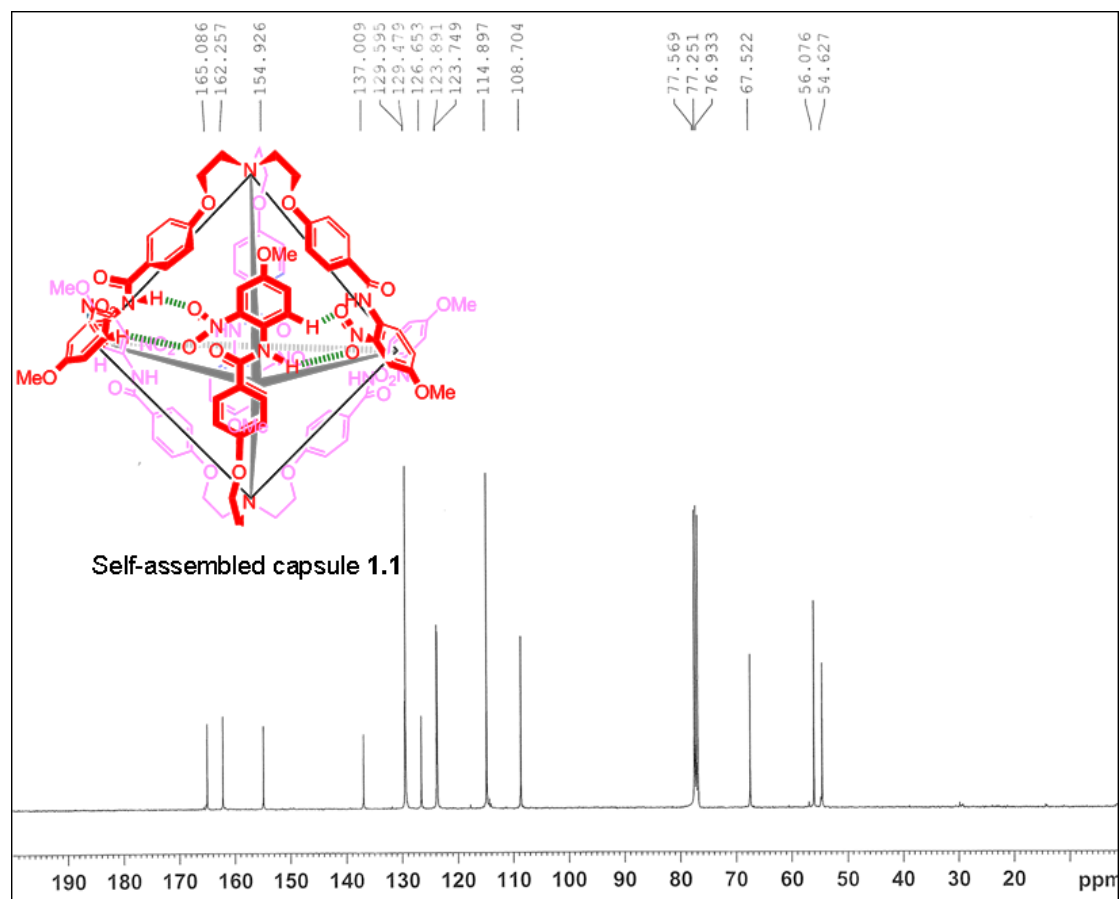

**Fig. S4** <sup>13</sup>C NMR (100 MHz, CDCl<sub>3</sub>, 20 °C) spectrum of self-assembled capsule **1.1**.

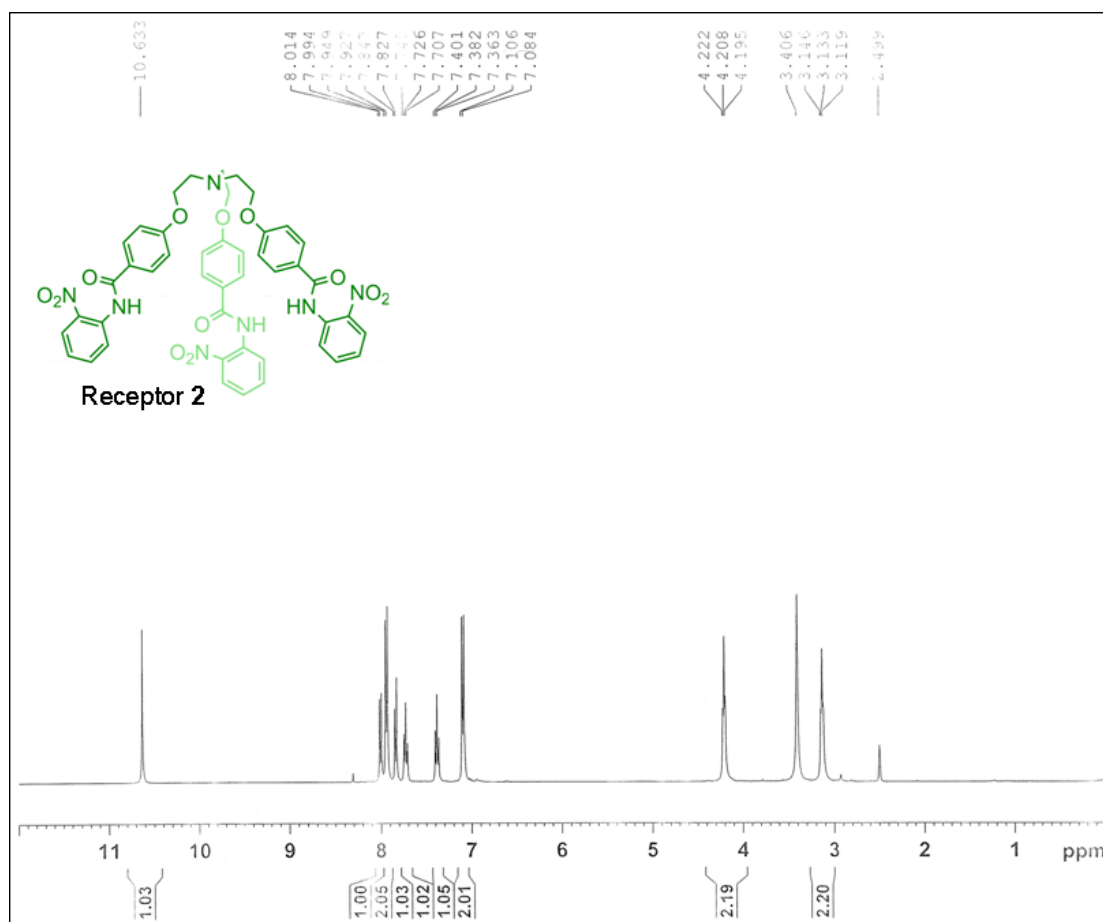

**Fig. S5** <sup>1</sup>H NMR (400 MHz, DMSO-*d*<sub>6</sub>, 20 °C) spectrum of receptor 2.

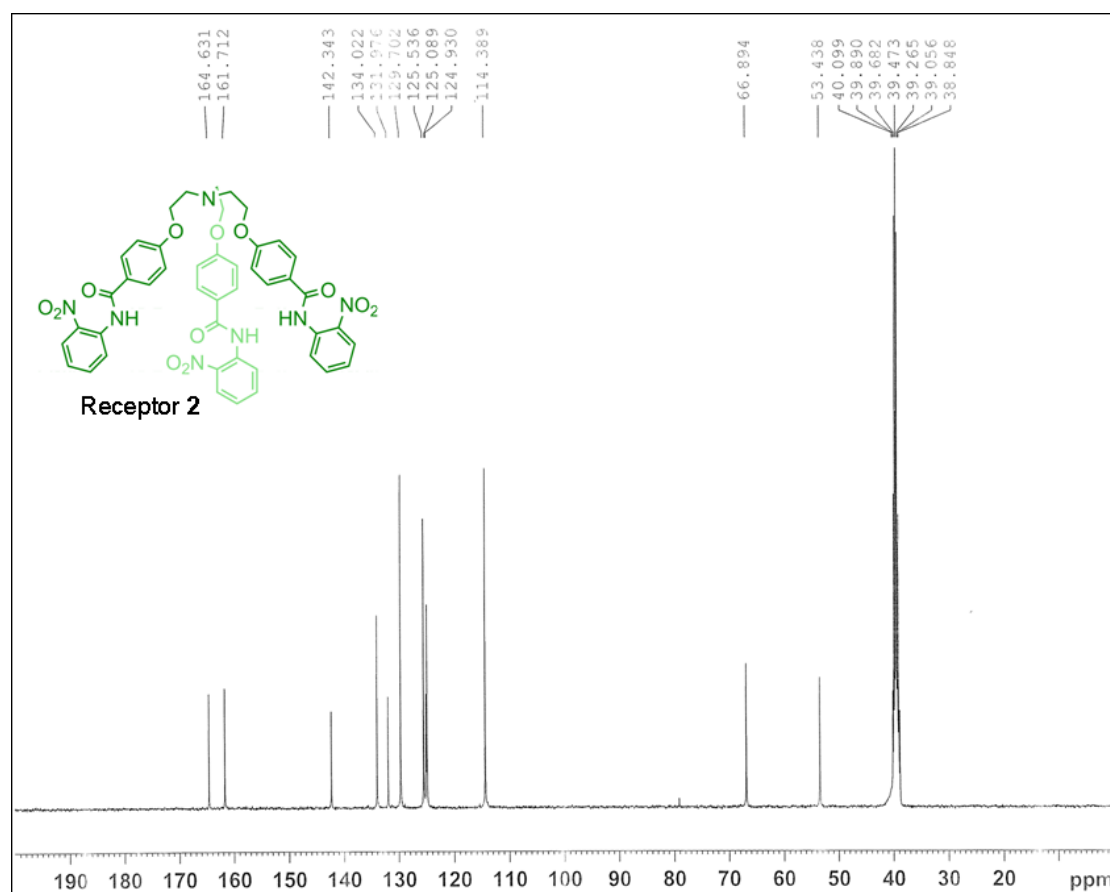

**Fig. S6**  $^{13}\text{C}$  NMR (400 MHz,  $\text{DMSO-}d_6$ , 20 °C) spectrum of receptor 2.

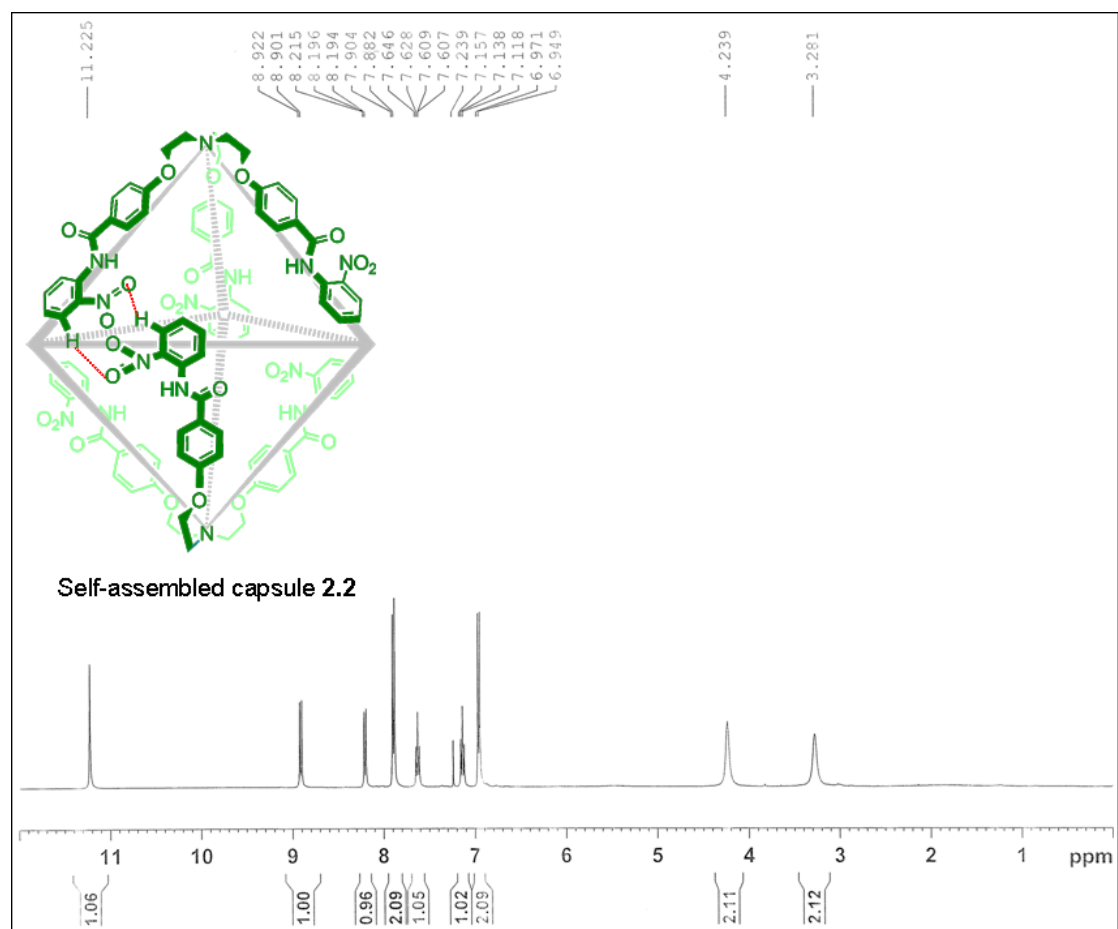

**Fig. S7**  $^1\text{H}$  NMR (400 MHz,  $\text{CDCl}_3$ , 20 °C) spectrum of self-assembled capsule 2.2.

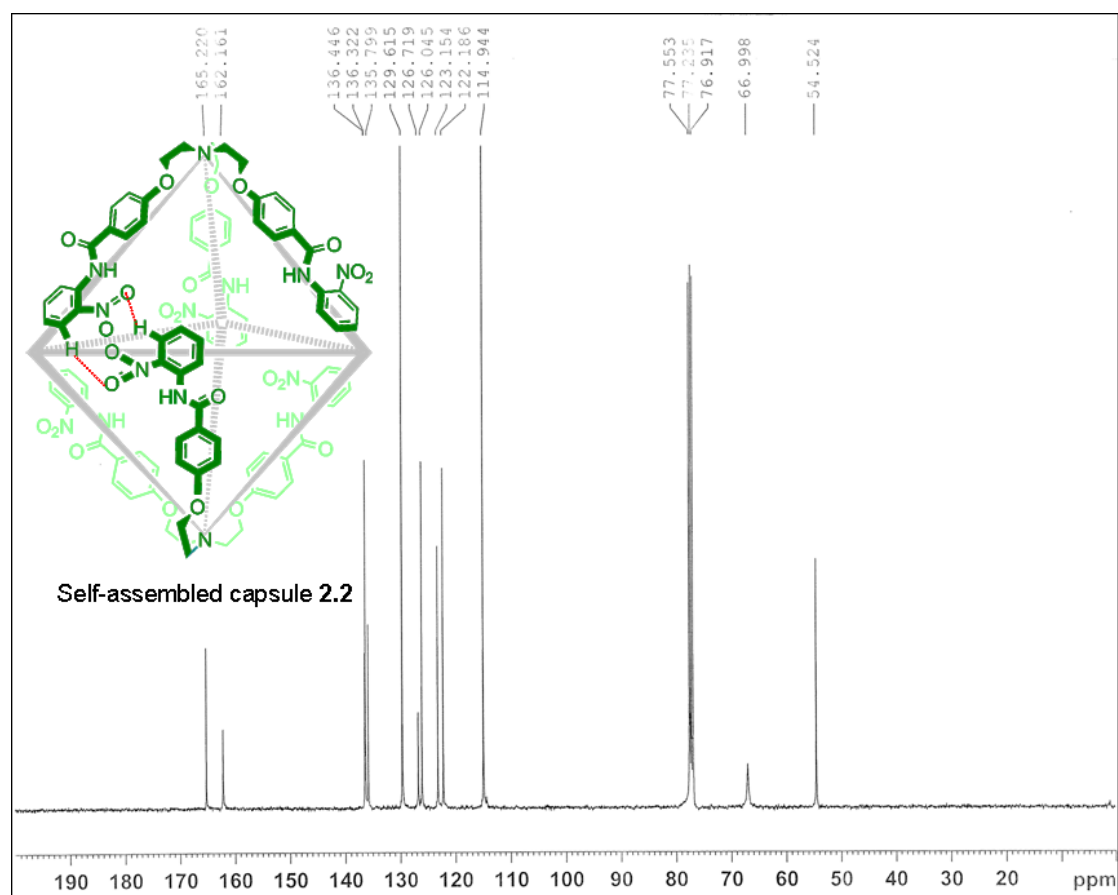

**Fig. S8**  $^{13}\text{C}$  NMR (400 MHz,  $\text{CDCl}_3$ , 20 °C) spectrum of self-assembled capsule **2.2**.

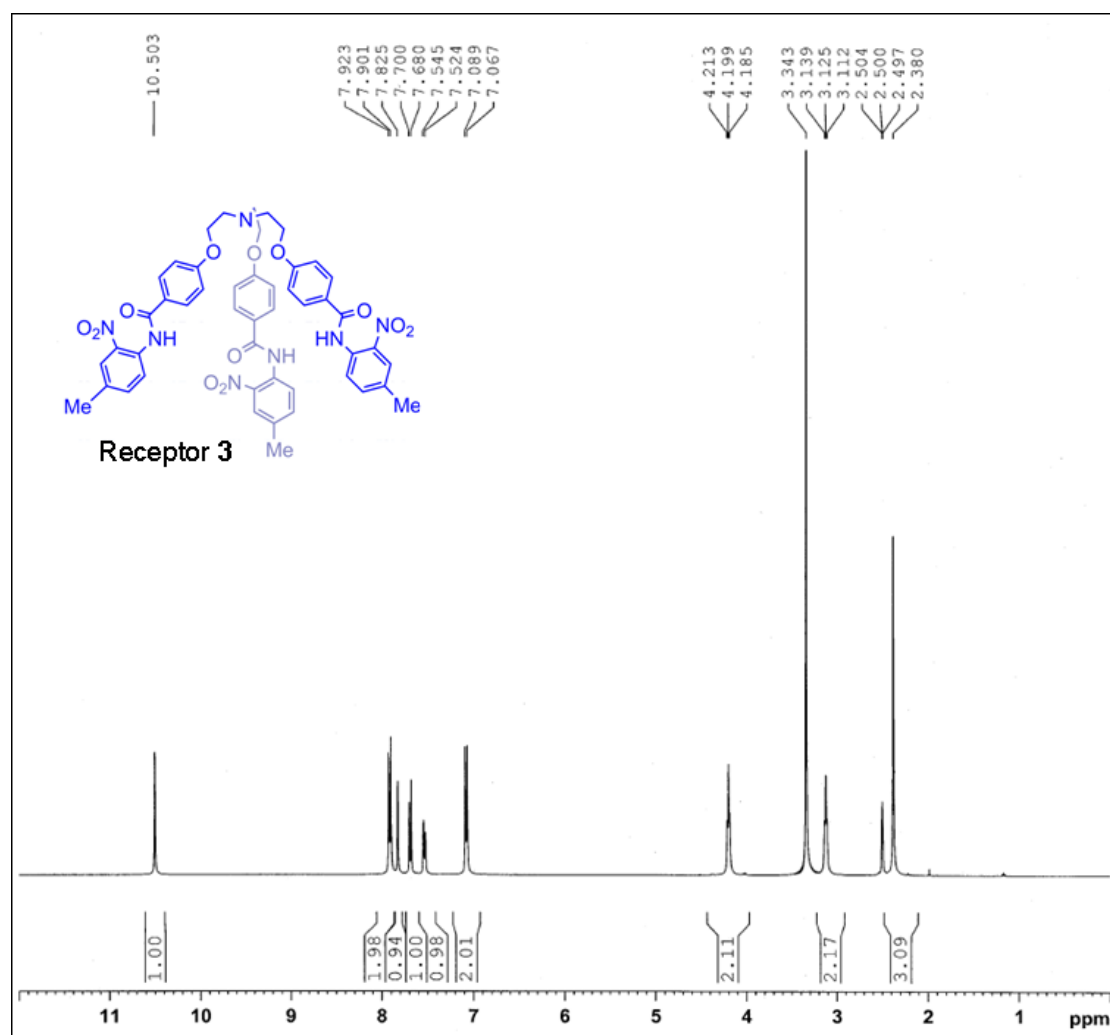

**Fig. S9** <sup>1</sup>H NMR (400 MHz, DMSO-*d*<sub>6</sub>, 20 °C) spectrum of receptor **3**.

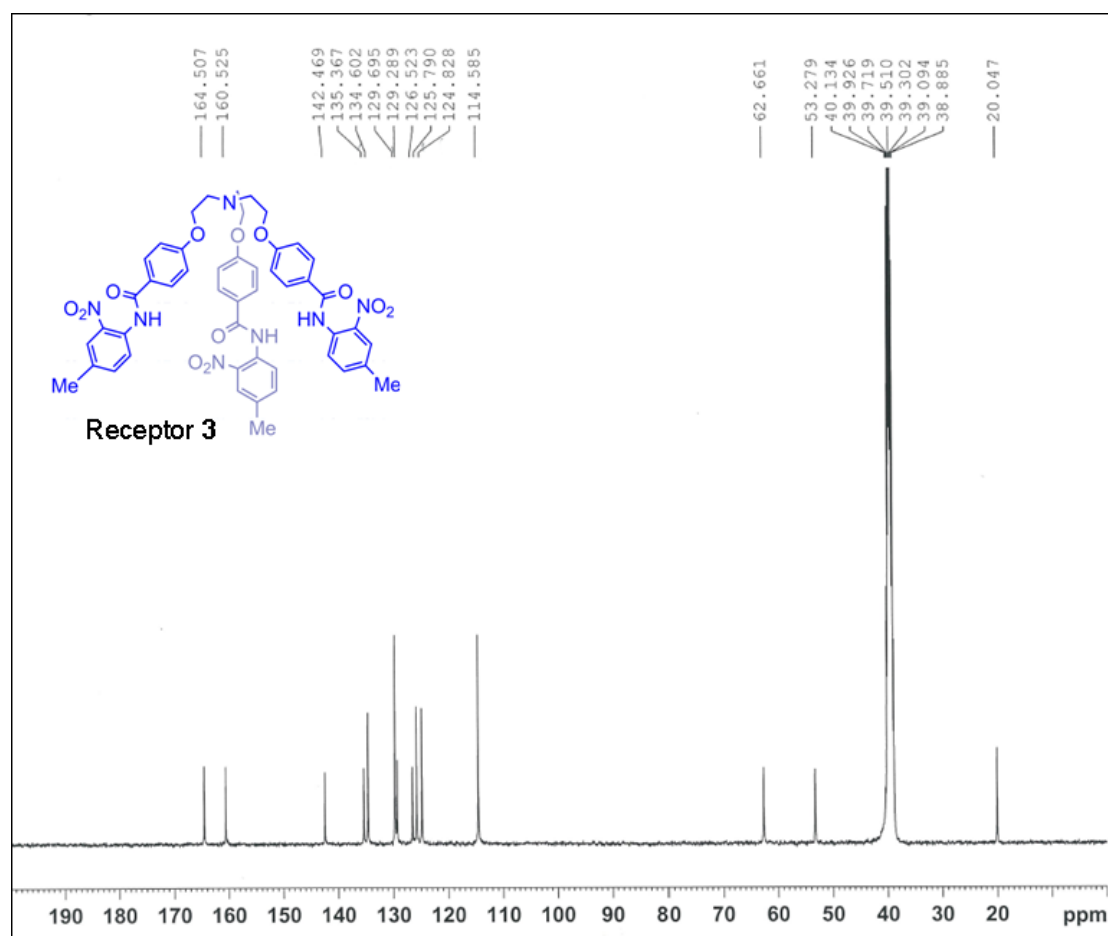

**Fig. S10**  $^{13}\text{C}$  NMR (400 MHz,  $\text{DMSO-}d_6$ , 20 °C) spectrum of receptor 3.



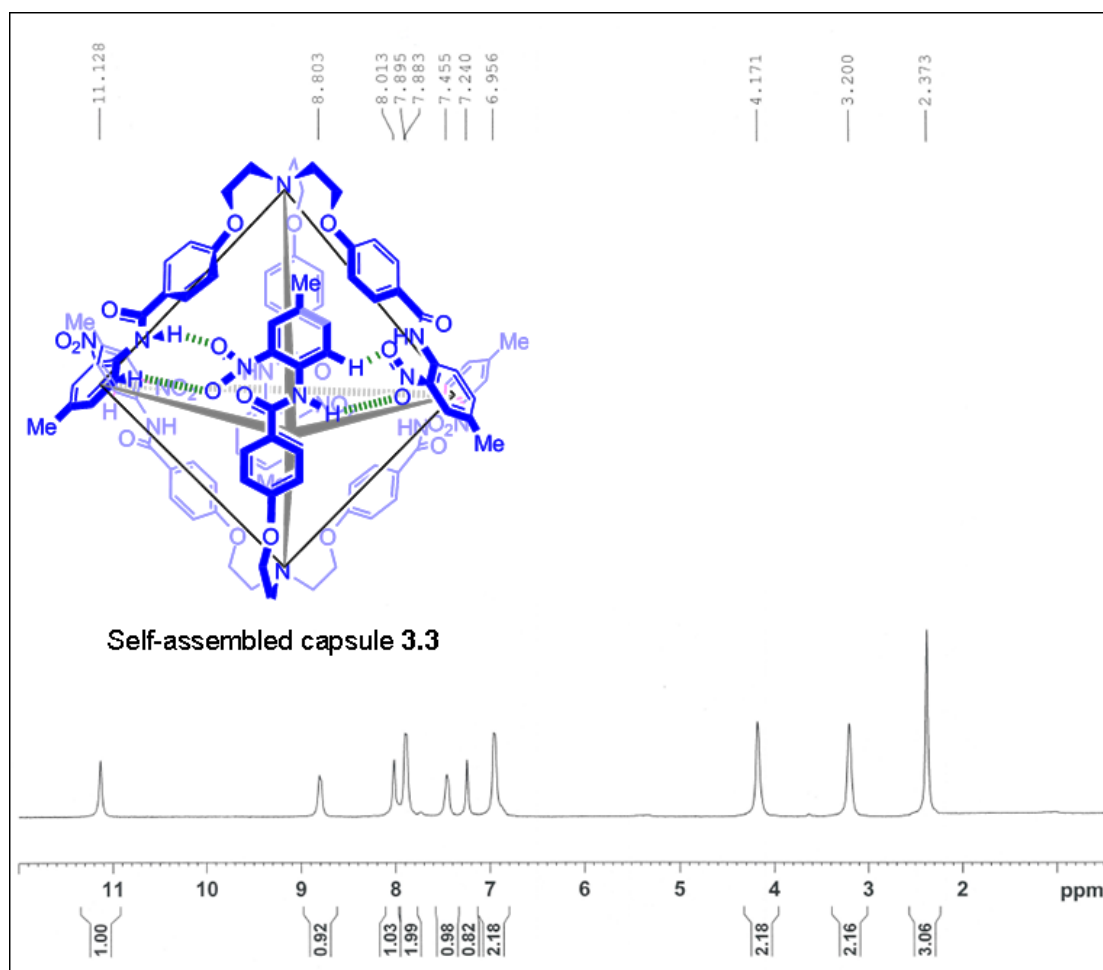

**Fig. S11**  $^1\text{H}$  NMR (400 MHz,  $\text{CDCl}_3$ , 20 °C) spectrum of self-assembled capsule **3.3**.

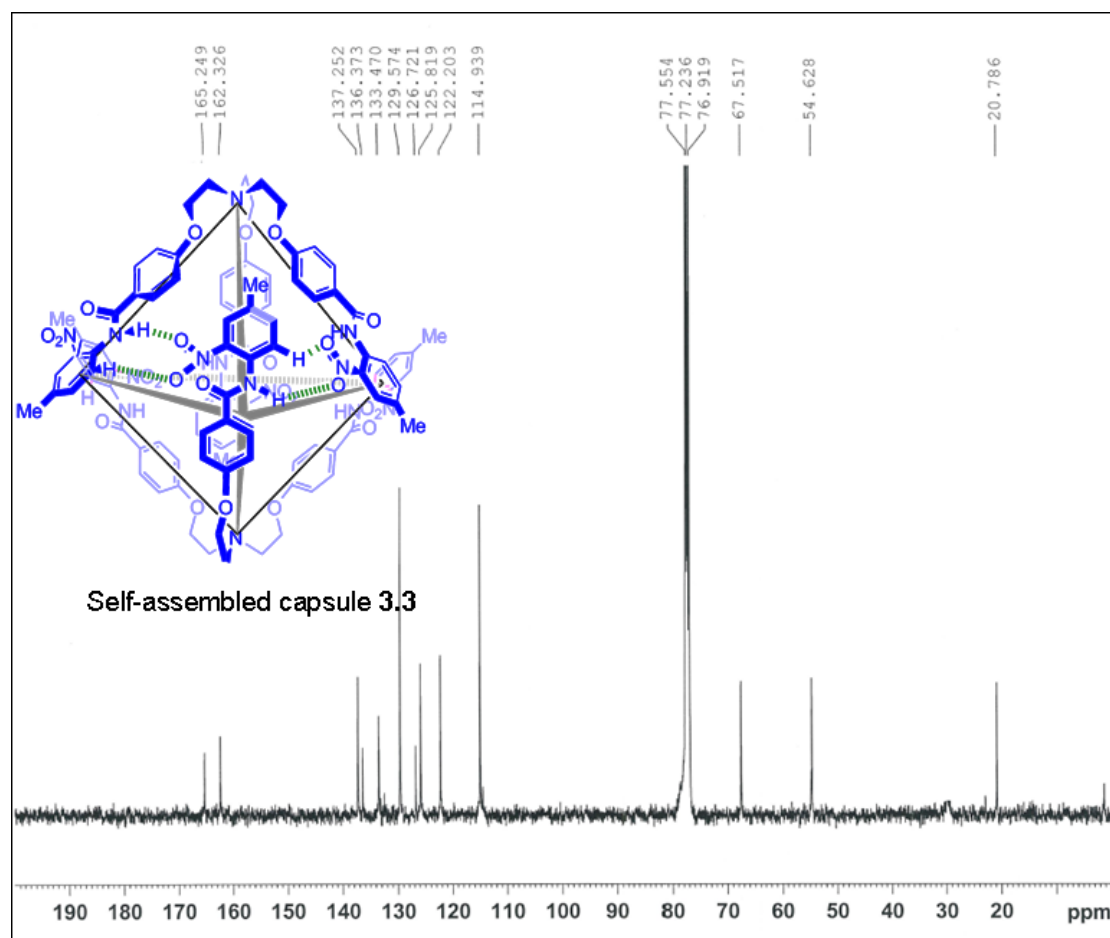

**Fig. S12**  $^{13}\text{C}$  NMR (400 MHz,  $\text{CDCl}_3$ , 20 °C) spectrum of self-assembled capsule **3.3**.

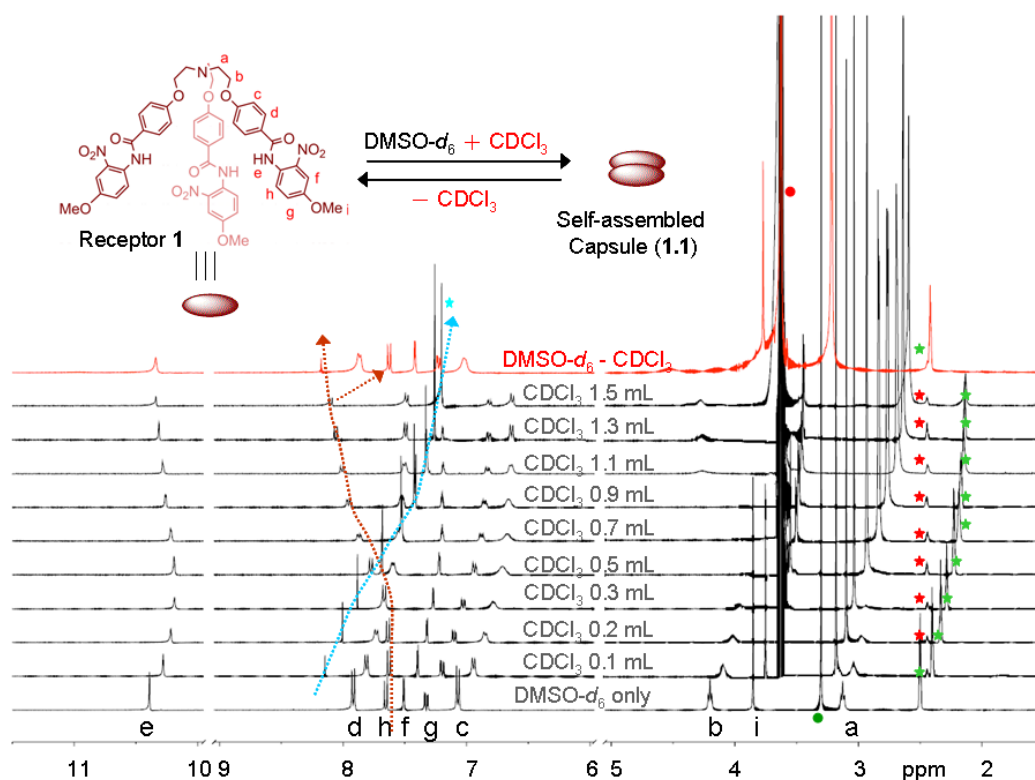

**Fig. S13**  $^1\text{H}$  NMR (400 MHz, 20 °C) titration spectra of receptor **1** (10.3 mM) in a  $\text{DMSO-}d_6$  solution with varying amount of  $\text{CDCl}_3$  with TMS (in  $\text{DMSO-}d_6$ ) as the internal reference. Green stars represent the peaks of  $\text{DMSO-}d_6$  used as solvent. Red stars represent the peaks of  $\text{DMSO-}d_6$  from the internal reference. Circles in green and red color represent the peaks for water from solvent  $\text{DMSO-}d_6$  and from internal reference, respectively. A star mark in blue color represents peak for  $\text{CDCl}_3$ . The spectrum in red color was recorded after partial evaporation of  $\text{CDCl}_3$  from the mixture solution, showing reversible capsule formation through dynamic self-assembly of receptor **1**.

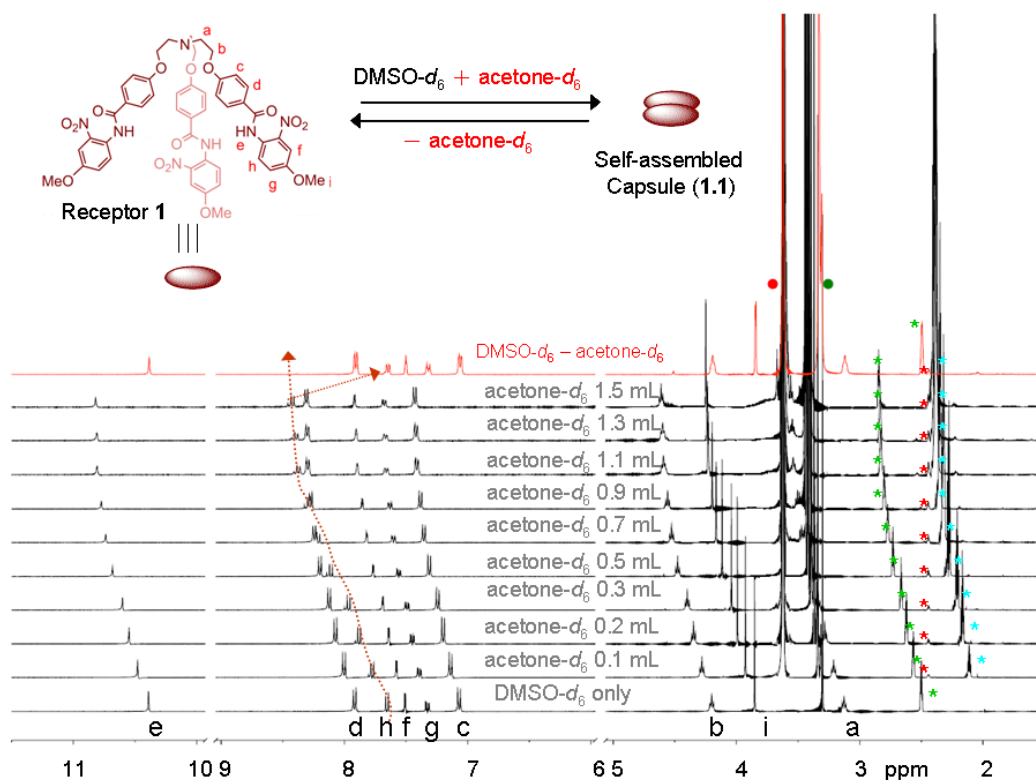

**Fig. S14**  $^1\text{H}$  NMR (400 MHz, 20 °C) titration spectra of receptor **1** (10.3 mM) in a  $\text{DMSO-}d_6$  solution with varying amount of  $\text{acetone-}d_6$  with TMS (in  $\text{DMSO-}d_6$ ) as the internal reference. Green stars represent the peaks of  $\text{DMSO-}d_6$  used as solvent. Red stars represent the peaks of  $\text{DMSO-}d_6$  from the internal reference. Circles in green and red color represent the peaks for water from solvent  $\text{DMSO-}d_6$  and from internal reference, respectively. Star marks in blue color represent the peaks for  $\text{acetone-}d_6$ . The spectrum in red color was recorded after partial evaporation of  $\text{acetone-}d_6$  from the mixture solution, showing reversible capsule formation through dynamic self-assembly of receptor **1**.

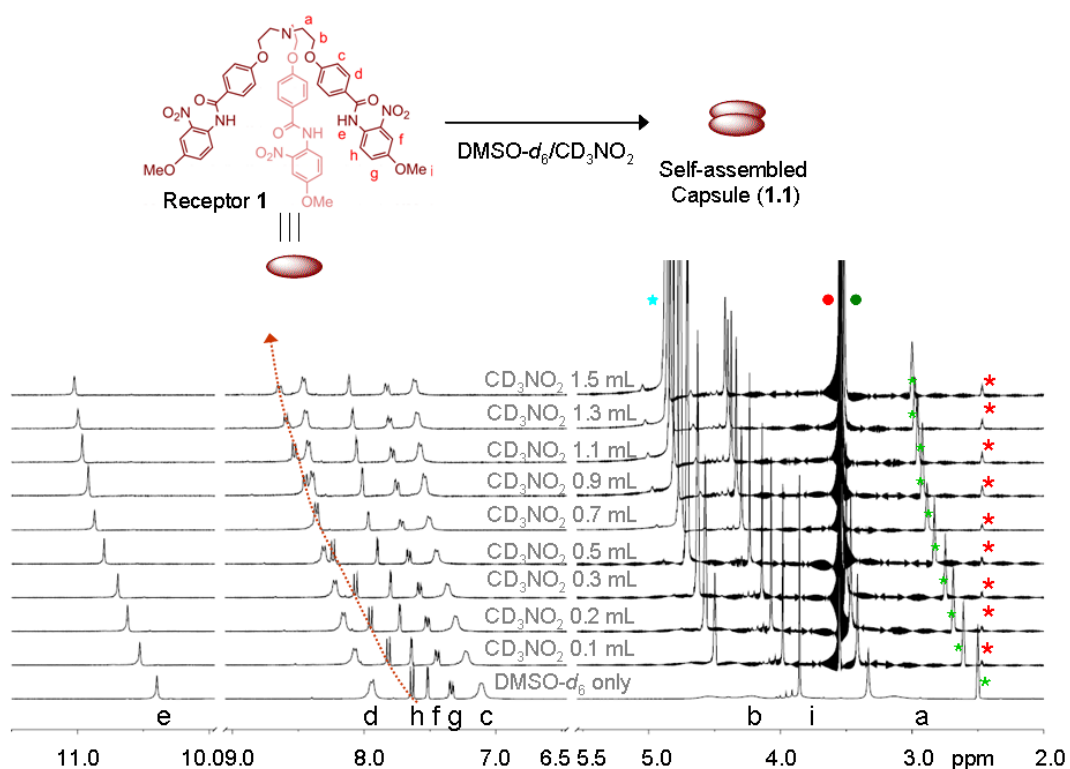

**Fig. S15**  $^1\text{H}$  NMR (400 MHz, 20 °C) titration spectra of receptor **1** (10.3 mM) in a  $\text{DMSO-}d_6$  solution with varying amount of  $\text{CD}_3\text{NO}_2$  with TMS (in  $\text{DMSO-}d_6$ ) as the internal reference. Green stars represent the peaks of  $\text{DMSO-}d_6$  used as solvent. Red stars represent the peaks of  $\text{DMSO-}d_6$  from the internal reference. Circles in green and red color represent the peaks for water from solvent  $\text{DMSO-}d_6$  and from internal reference, respectively. A star mark in blue color represents peak for  $\text{CD}_3\text{NO}_2$ .

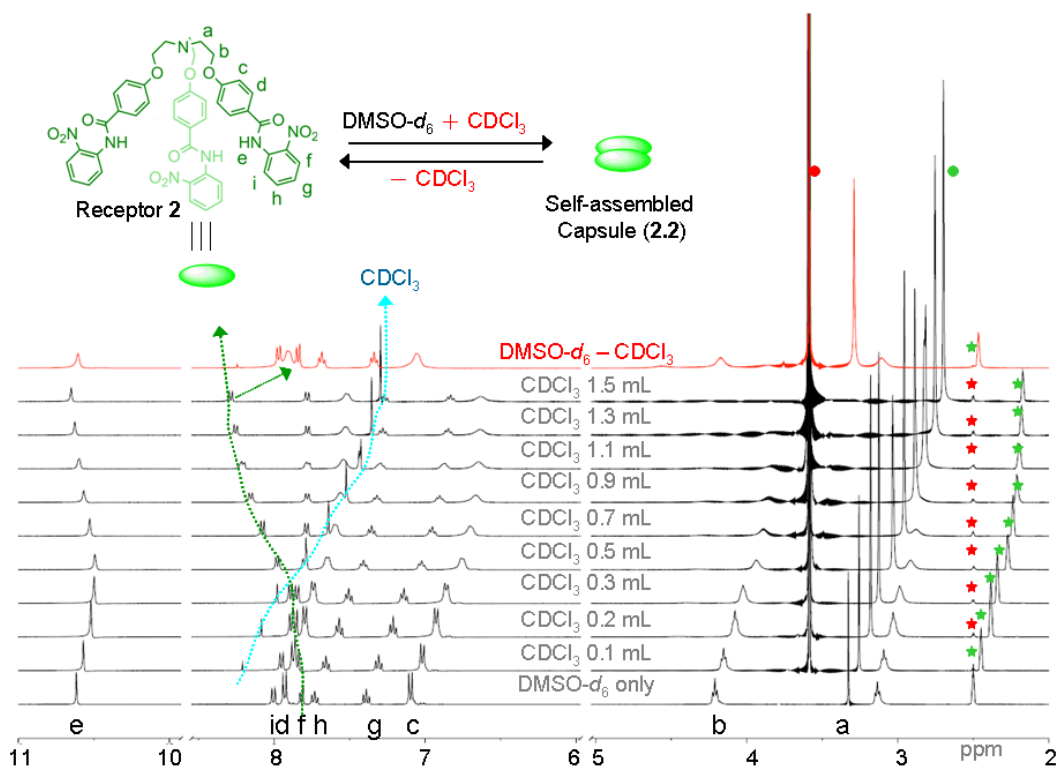

**Fig. S16**  $^1\text{H}$  NMR (400 MHz, 20  $^\circ\text{C}$ ) titration spectra of receptor **2** (10.3 mM) in a  $\text{DMSO-}d_6$  solution with varying amount of  $\text{CDCl}_3$  with TMS (in  $\text{DMSO-}d_6$ ) as the internal reference. Green stars represent the peaks of  $\text{DMSO-}d_6$  used as solvent. Red stars represent the peaks of  $\text{DMSO-}d_6$  from the internal reference. Circles in green and red color represent the peaks for water from solvent  $\text{DMSO-}d_6$  and from internal reference, respectively. A dash line in blue color represents the peak for  $\text{CDCl}_3$ . The spectrum in red color was recorded after partial evaporation of  $\text{CDCl}_3$  from the mixture solution, showing reversible capsule formation through dynamic self-assembly of receptor **2**.

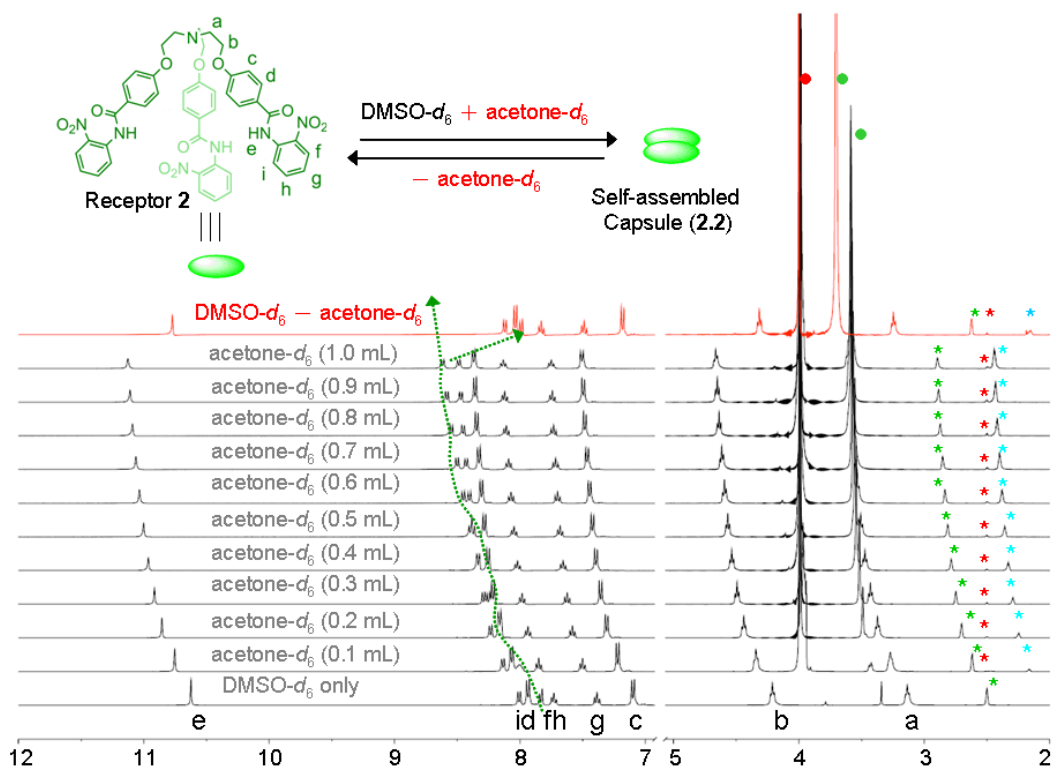

**Fig. S17**  $^1\text{H}$  NMR (400 MHz, 20 °C) titration spectra of receptor **2** (10.3 mM) in a  $\text{DMSO-}d_6$  solution with varying amount of  $\text{acetone-}d_6$  with TMS (in  $\text{DMSO-}d_6$ ) as the internal reference. Green stars represent the peaks of  $\text{DMSO-}d_6$  used as solvent. Red stars represent the peaks of  $\text{DMSO-}d_6$  from the internal reference. Circles in green and red color represent the peaks for water from solvent  $\text{DMSO-}d_6$  and from internal reference, respectively. A star mark in blue color represents the peak for  $\text{acetone-}d_6$ . The spectrum in red color was recorded after partial evaporation of  $\text{acetone-}d_6$  from the mixture solution, showing reversible capsule formation through dynamic self-assembly of receptor **2**.

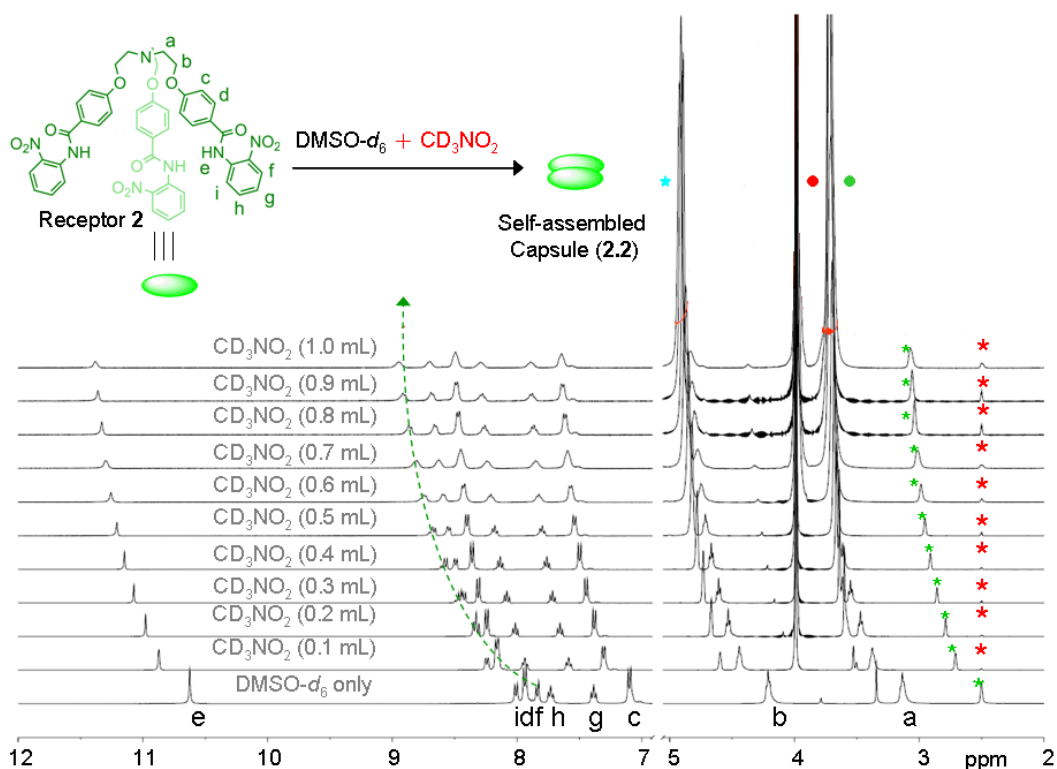

**Fig. S18** <sup>1</sup>H NMR (400 MHz, 20 °C) titration spectra of receptor **2** (10.3 mM) in a DMSO-*d*<sub>6</sub> solution with varying amount of CD<sub>3</sub>NO<sub>2</sub> with TMS (in DMSO-*d*<sub>6</sub>) as the internal reference. Green stars represent the peaks of DMSO-*d*<sub>6</sub> used as solvent. Red stars represent the peaks of DMSO-*d*<sub>6</sub> from the internal reference. Circles in green and red color represent the peaks for water from solvent DMSO-*d*<sub>6</sub> and from internal reference, respectively. A star mark in blue color represents the peak for CD<sub>3</sub>NO<sub>2</sub>.



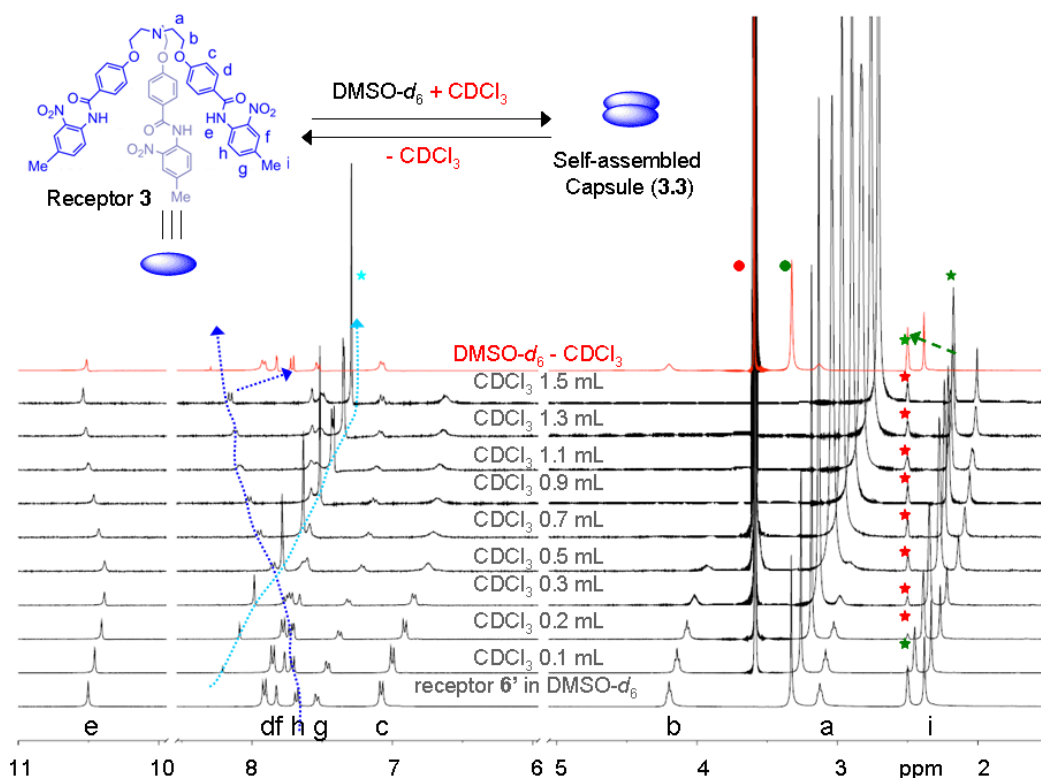

**Fig. S19**  $^1\text{H}$  NMR (400 MHz, 20 °C) titration spectra of receptor **3** (10.3 mM) in a  $\text{DMSO-}d_6$  solution with varying amount of  $\text{CDCl}_3$  with TMS (in  $\text{DMSO-}d_6$ ) as the internal reference. Green stars represent the peaks of  $\text{DMSO-}d_6$  used as solvent. Red stars represent the peaks of  $\text{DMSO-}d_6$  from the internal reference. Circles in green and red color represent the peaks for water from solvent  $\text{DMSO-}d_6$  and from internal reference, respectively. A star mark in blue color represents peak for  $\text{CDCl}_3$ . The spectrum in red color was recorded after partial evaporation of  $\text{CDCl}_3$  from the mixture solution, showing reversible capsule formation through dynamic self-assembly of receptor **3**.

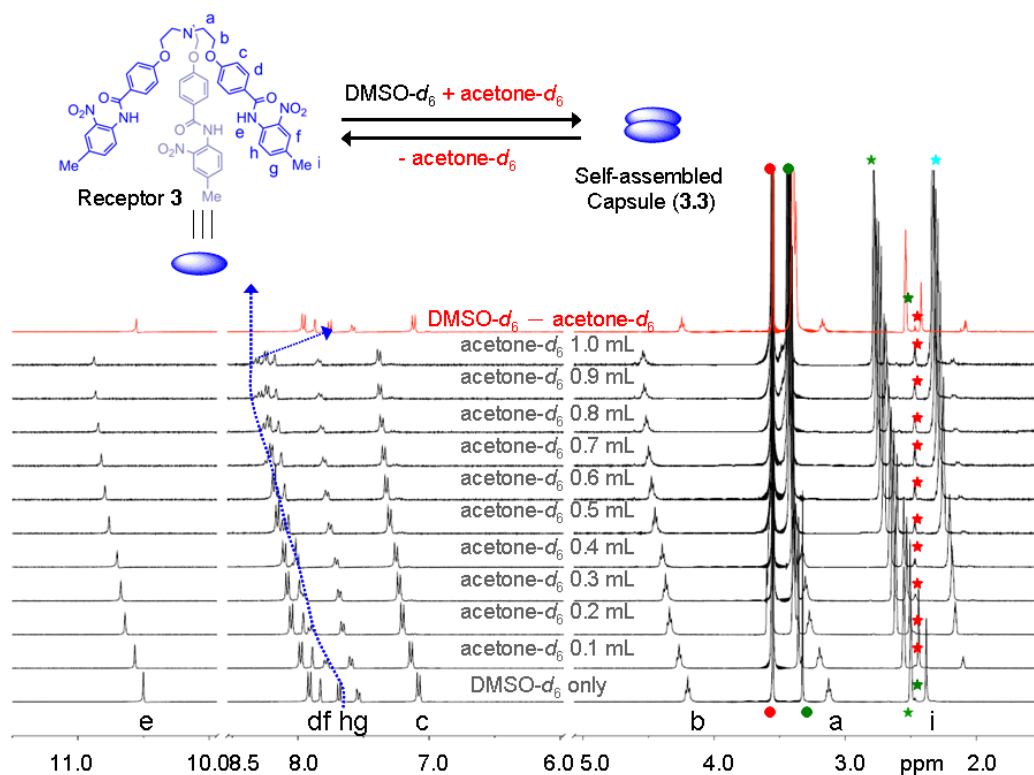

**Fig. S20**  $^1\text{H}$  NMR (400 MHz, 20 °C) titration spectra of receptor **3** (10.3 mM) in a  $\text{DMSO-}d_6$  solution with varying amount of  $\text{acetone-}d_6$  with TMS (in  $\text{DMSO-}d_6$ ) as the internal reference. Green stars represent the peaks of  $\text{DMSO-}d_6$  used as solvent. Red stars represent the peaks of  $\text{DMSO-}d_6$  from the internal reference. Circles in green and red color represent the peaks for water from solvent  $\text{DMSO-}d_6$  and from internal reference, respectively. A star mark in blue color represents peak for  $\text{acetone-}d_6$ . The spectrum in red color was recorded after partial evaporation of  $\text{acetone-}d_6$  from the mixture solution, showing reversible capsule formation through dynamic self-assembly of receptor **3**.

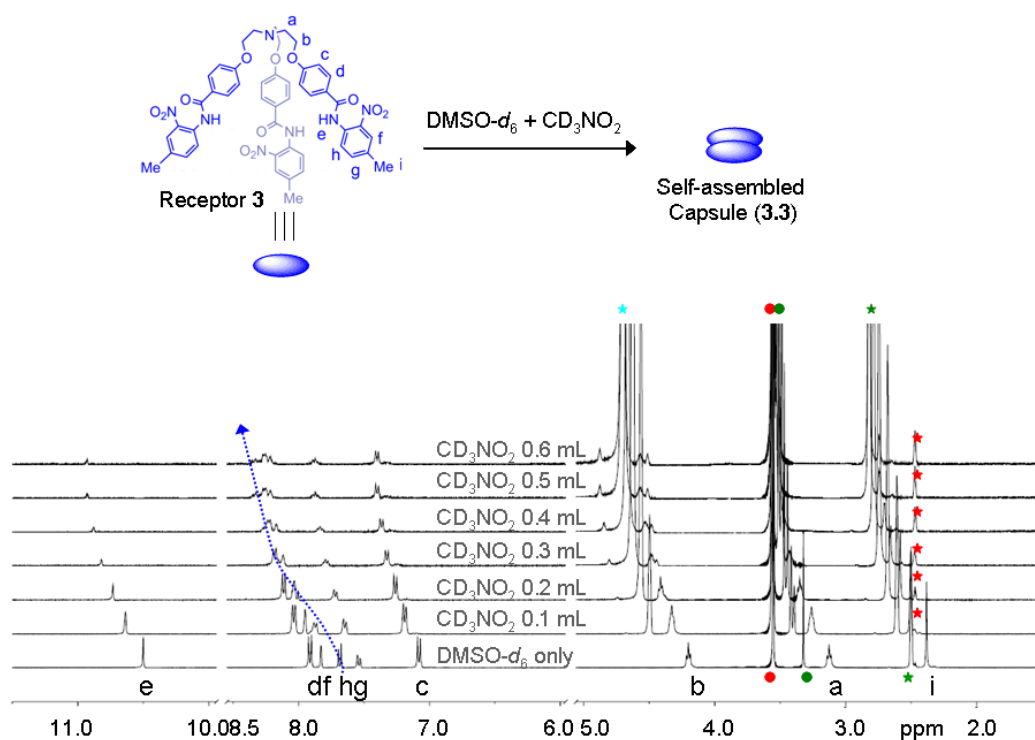

**Fig. S21** <sup>1</sup>H NMR (400 MHz, 20 °C) titration spectra of receptor **3** (10.3 mM) in a DMSO-*d*<sub>6</sub> solution with varying amount of CD<sub>3</sub>NO<sub>2</sub> with TMS (in DMSO-*d*<sub>6</sub>) as the internal reference. Green stars represent the peaks of DMSO-*d*<sub>6</sub> used as solvent. Red stars represent the peaks of DMSO-*d*<sub>6</sub> from the internal reference. Circles in green and red color represent the peaks for water from solvent DMSO-*d*<sub>6</sub> and from internal reference, respectively. A star mark in blue color represents peak for CD<sub>3</sub>NO<sub>2</sub>.

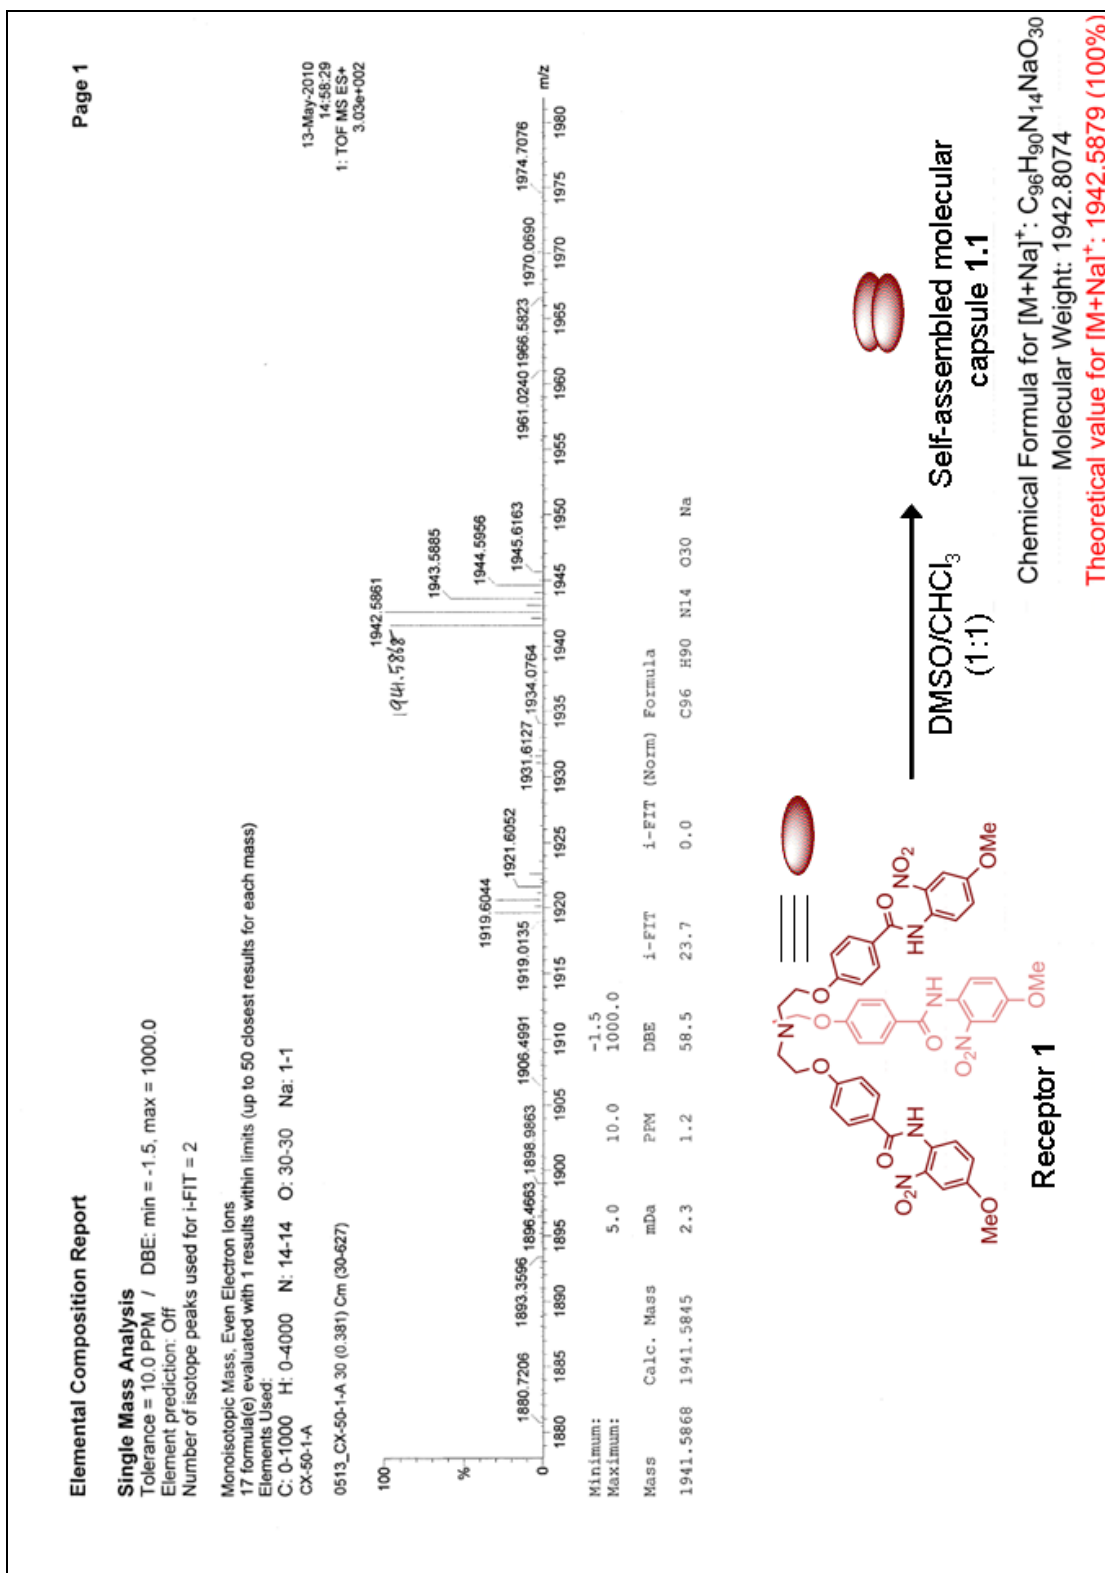

**Fig. S22** HRESI mass spectrum of the self-assembled capsule (**1.1**) recorded after dissolving receptor **1** in a mixture solution of DMSO/CHCl<sub>3</sub> (1:1).

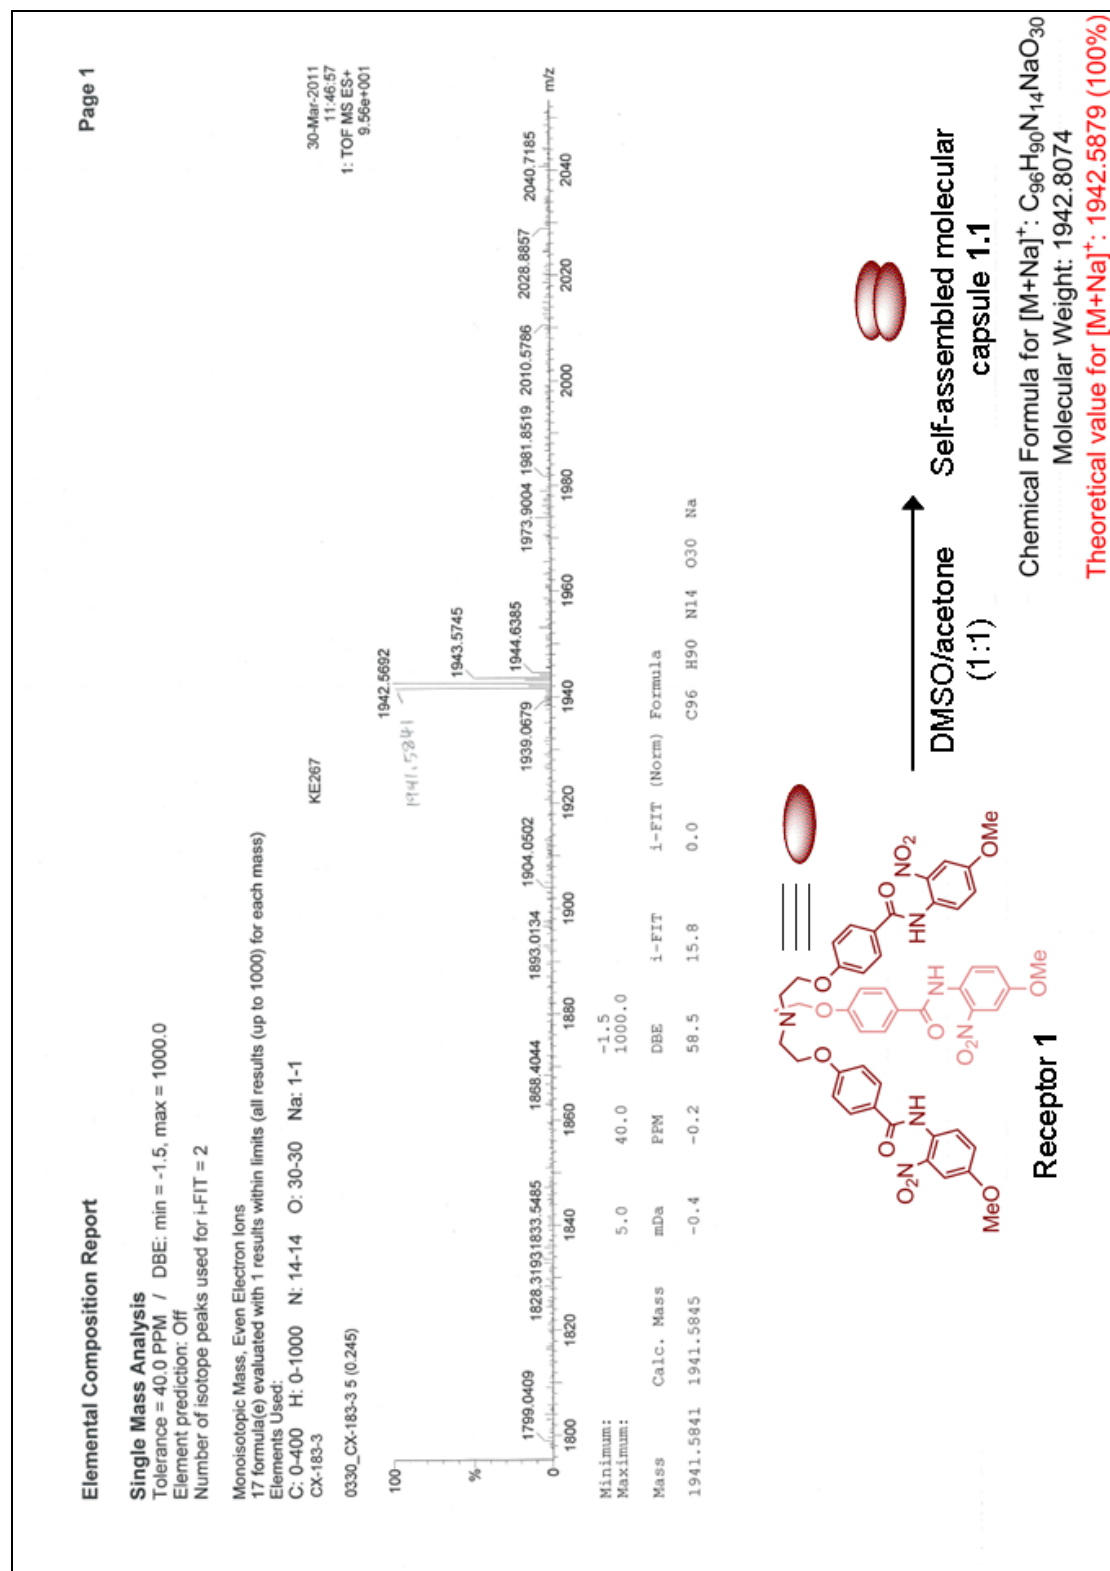

**Fig. S23** HRESI mass spectrum of the self-assembled capsule (**1.1**) recorded after dissolving receptor **1** in a mixture solution of DMSO/acetone (1:1).

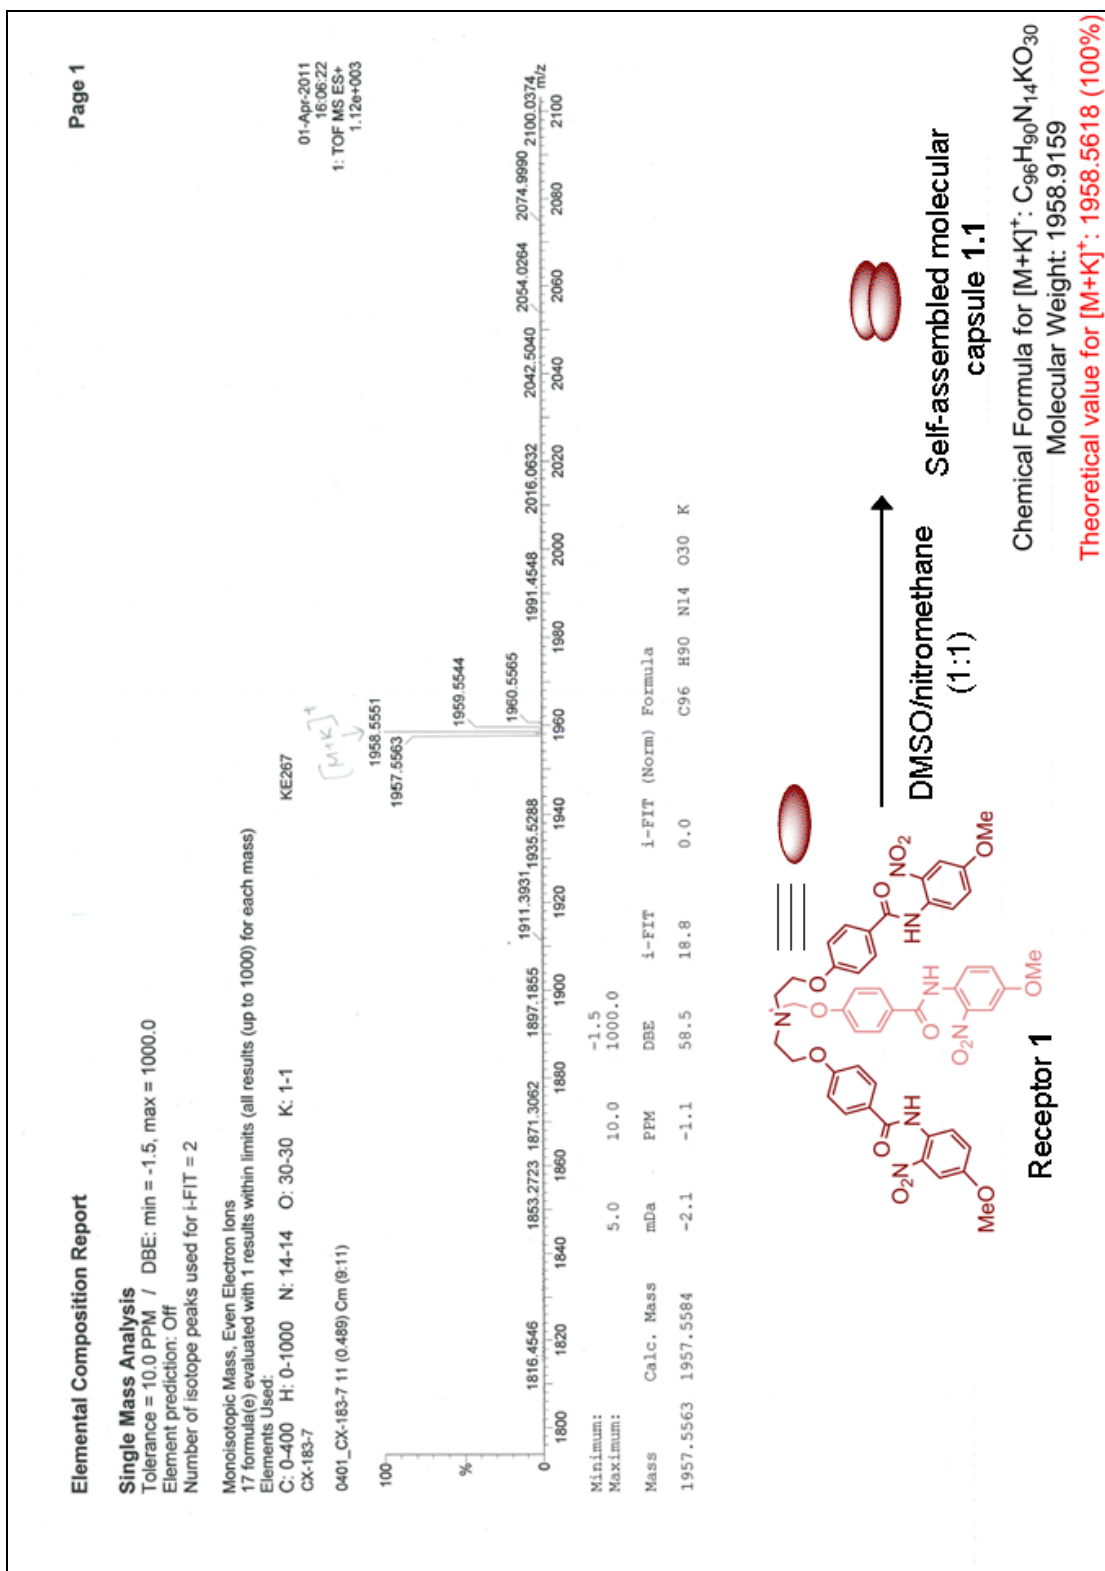

**Fig. S24** HRESI mass spectrum of the self-assembled capsule (**1.1**) recorded after dissolving receptor **1** in a mixture solution of DMSO/nitromethane (1:1).

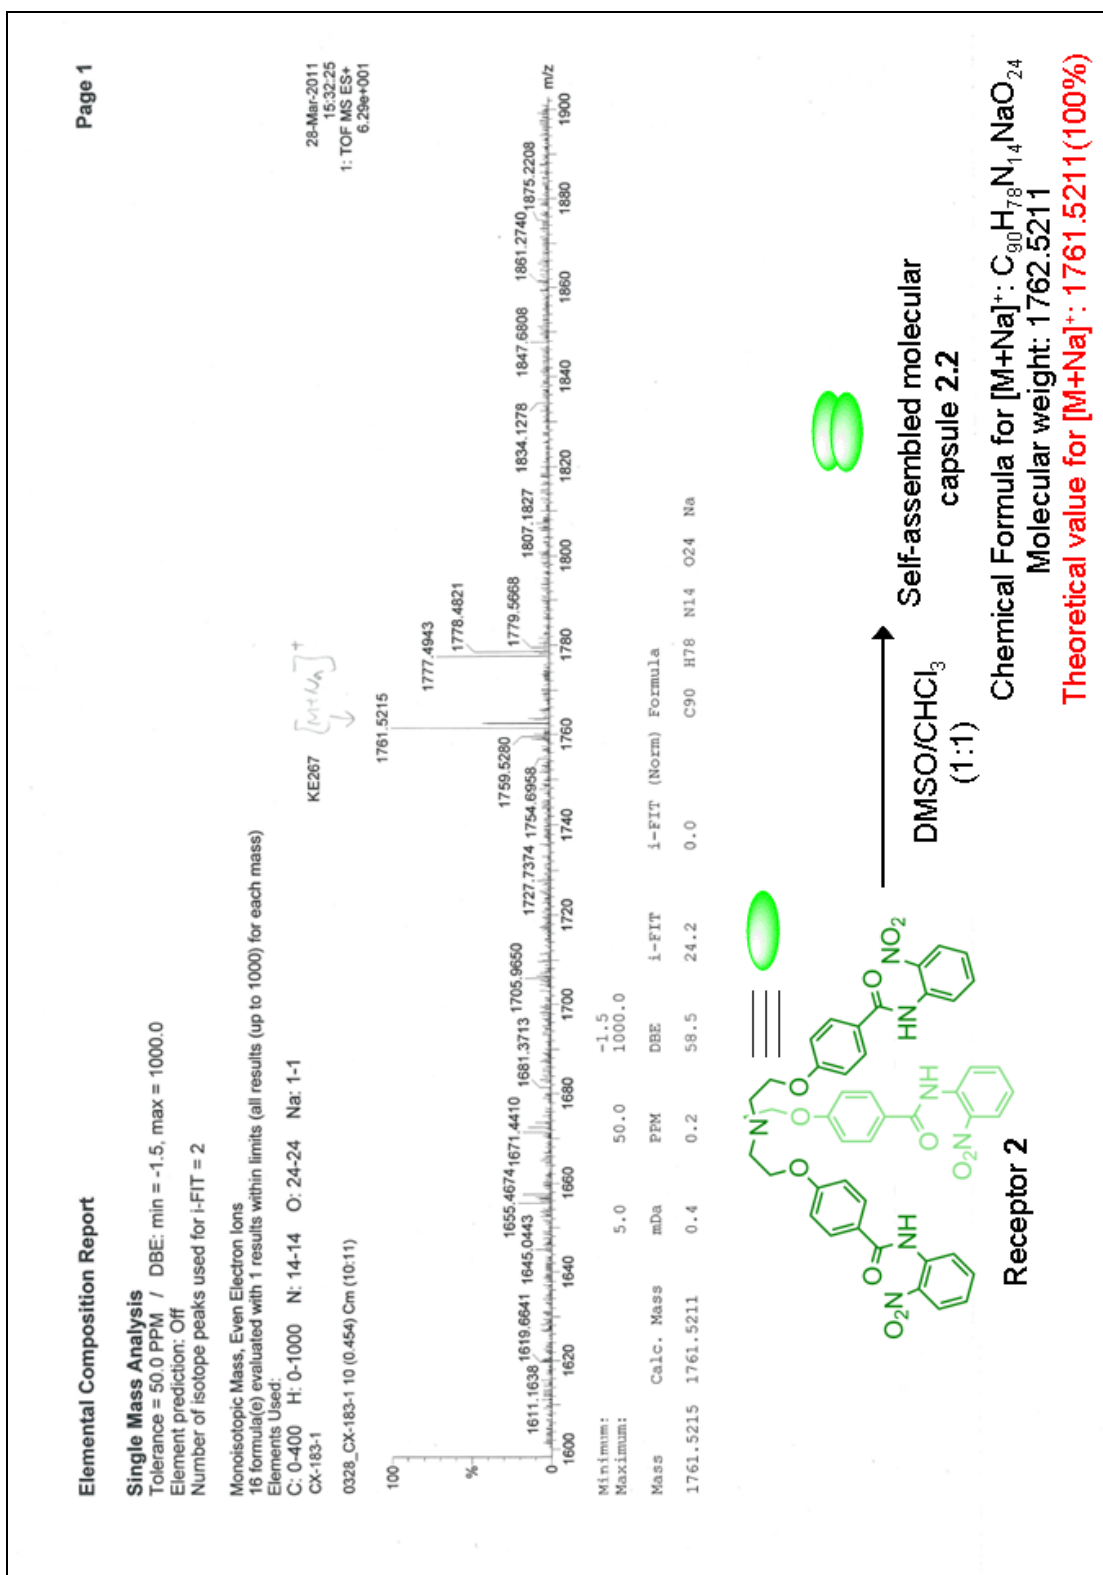

**Fig. S25** HRESI mass spectrum of the self-assembled capsule (**2.2**) recorded after dissolving receptor **2** in a mixture solution of DMSO/CHCl<sub>3</sub> (1:1).

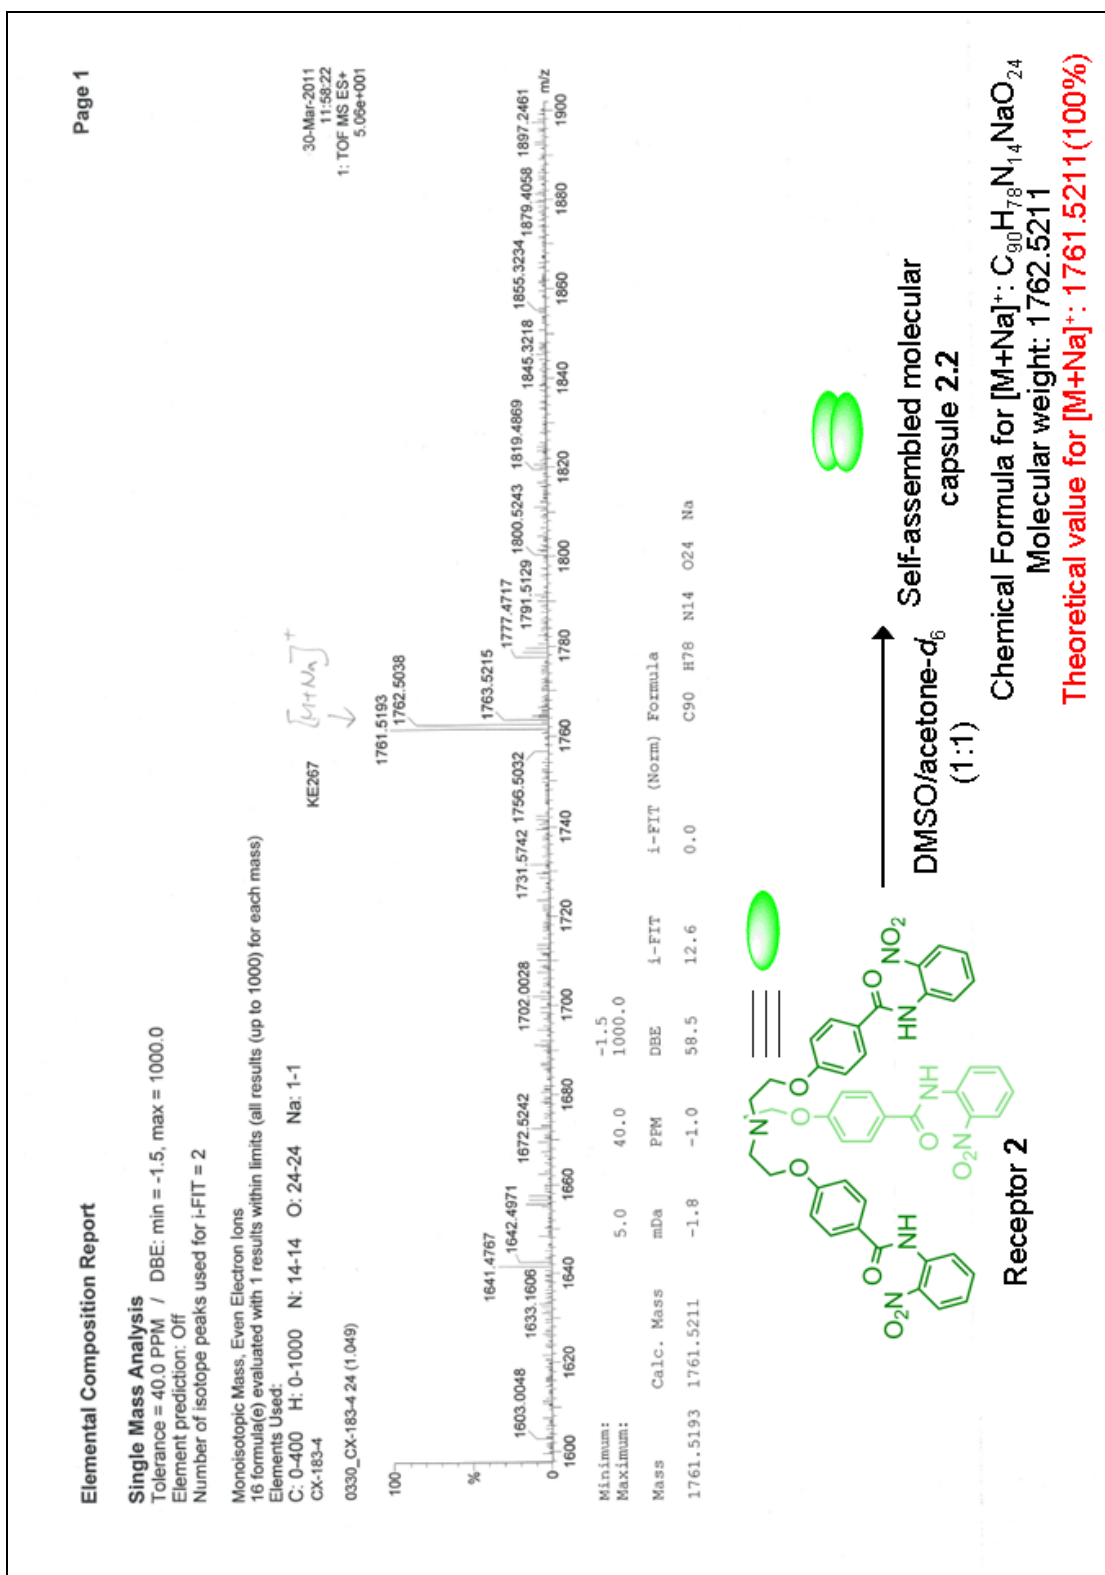

**Fig. S26** HRESI mass spectrum of the self-assembled capsule (**2.2**) recorded after dissolving receptor **2** in a mixture solution of DMSO/acetone (1:1).



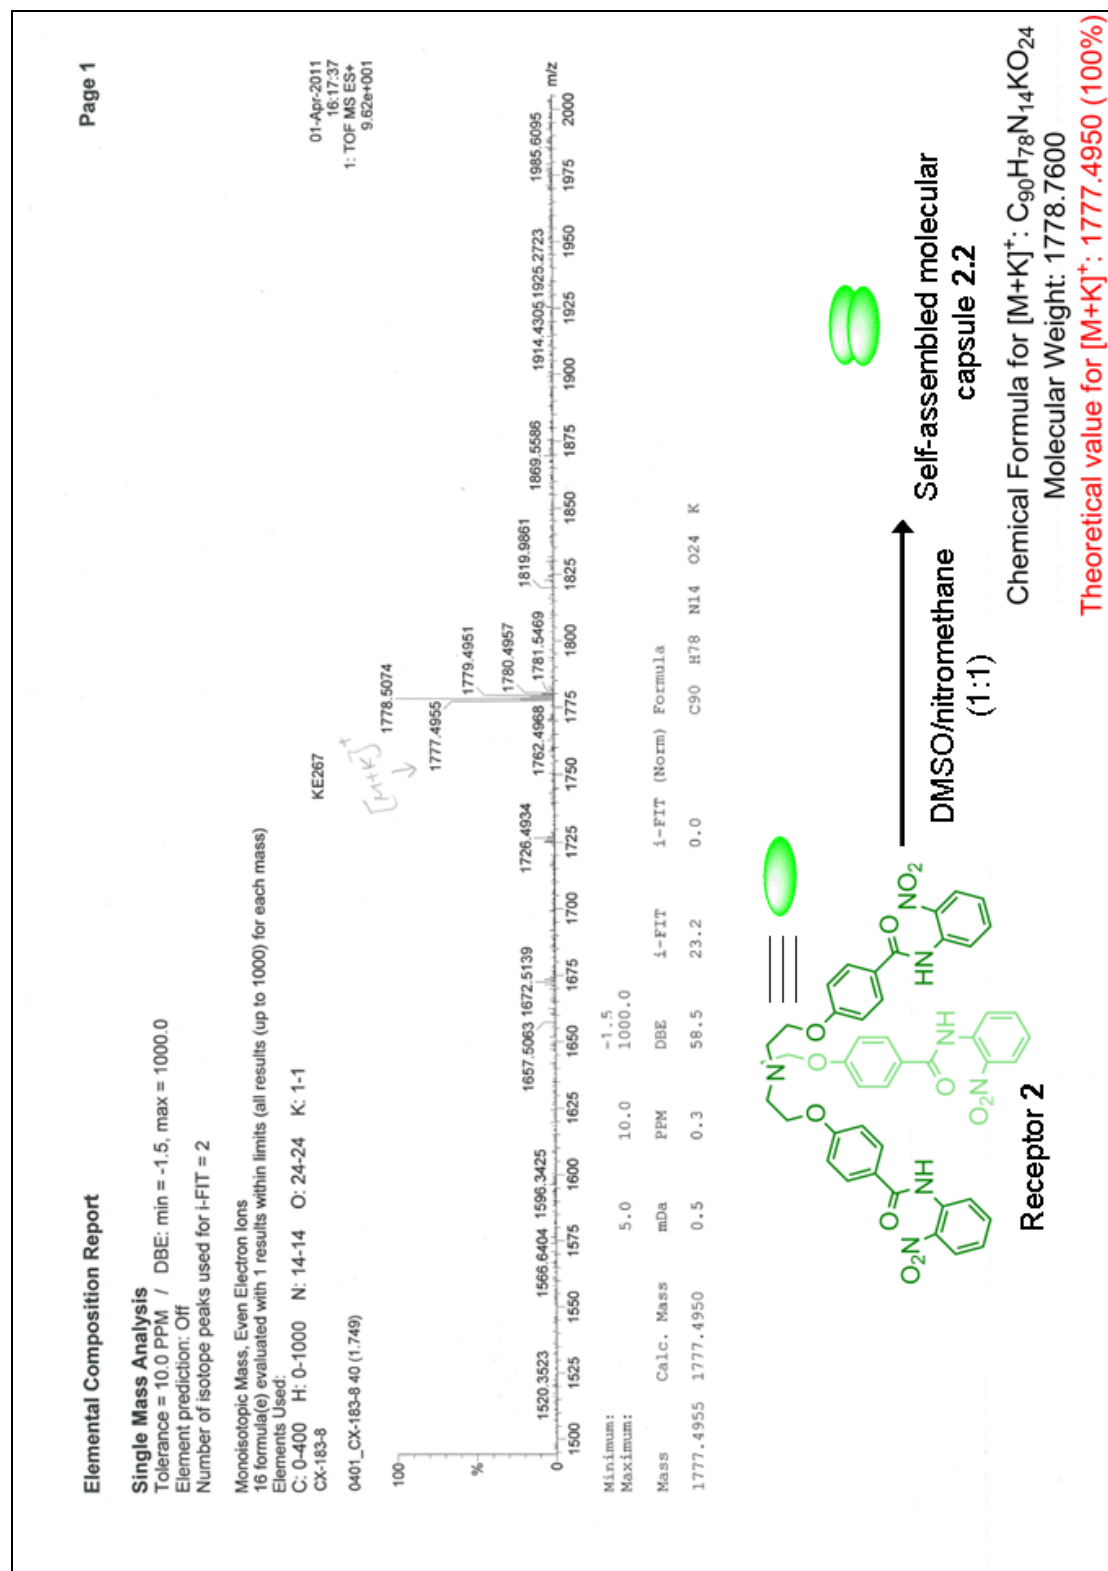

**Fig. S27** HRESI mass spectrum of the self-assembled capsule (**2.2**) recorded after dissolving receptor **2** in a mixture solution of DMSO/nitromethane (1:1).

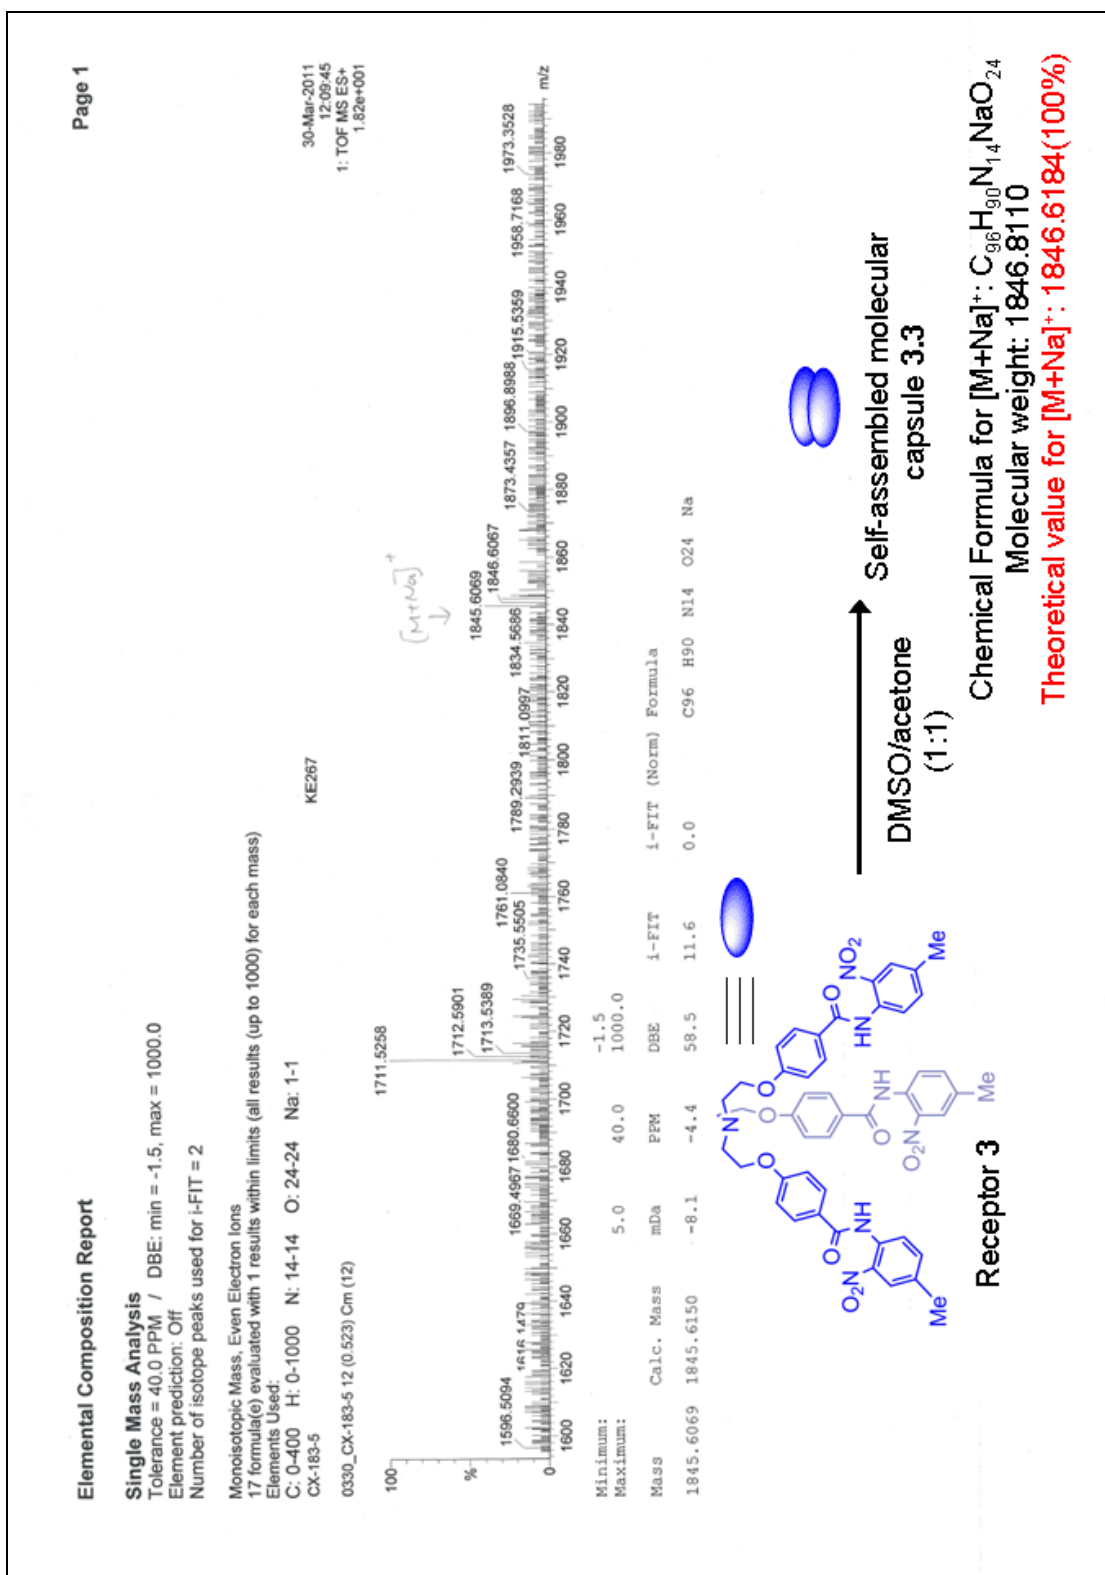

**Fig. S28** HRESI mass spectrum of the self-assembled capsule (3.3) recorded after dissolving receptor 3 in a mixture solution of DMSO/acetone (1:1).

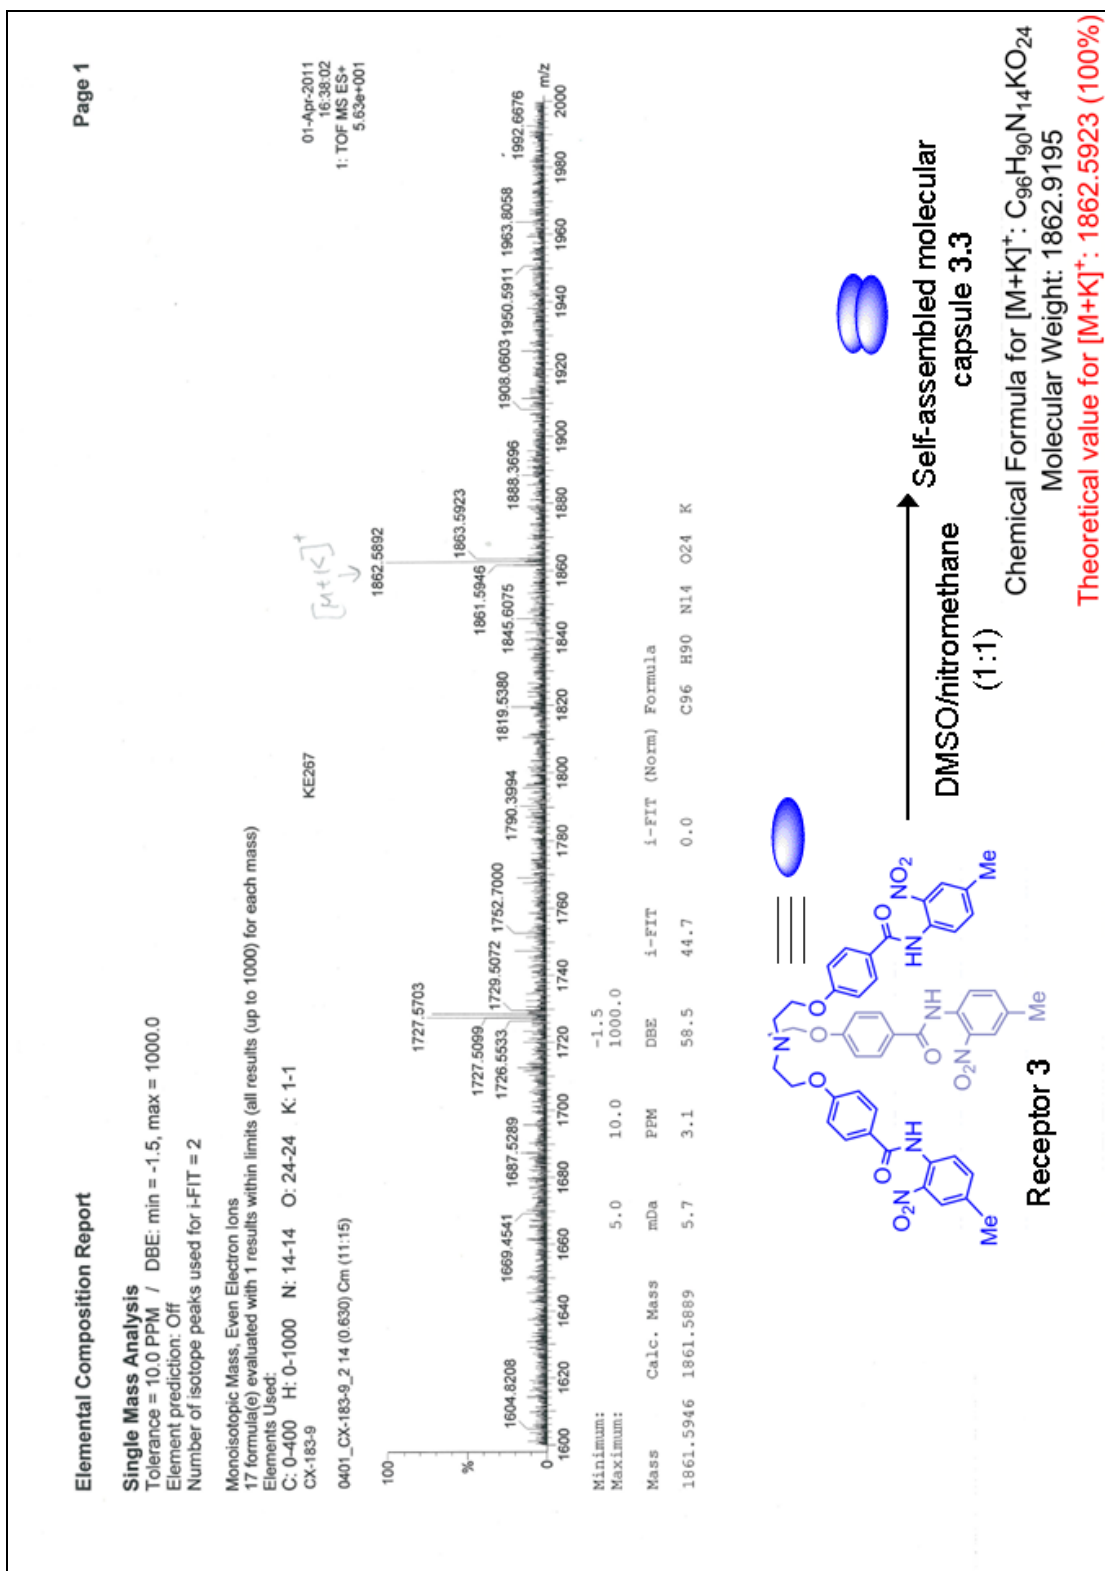

**Fig. S29** HRESI mass spectrum of the self-assembled capsule (**3.3**) recorded after dissolving receptor **3** in a mixture solution of DMSO/nitromethane (1:1).

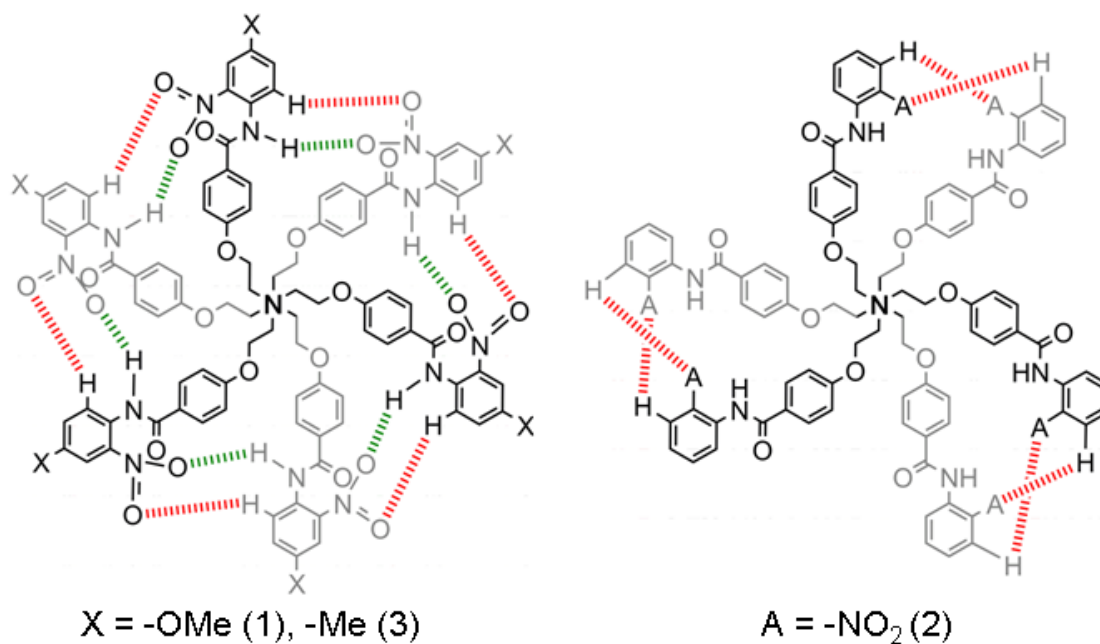

**Fig. S30** The binding modes of self-assembled capsules for receptors **1** and **3** (left) and model receptor **2** (right), respectively.

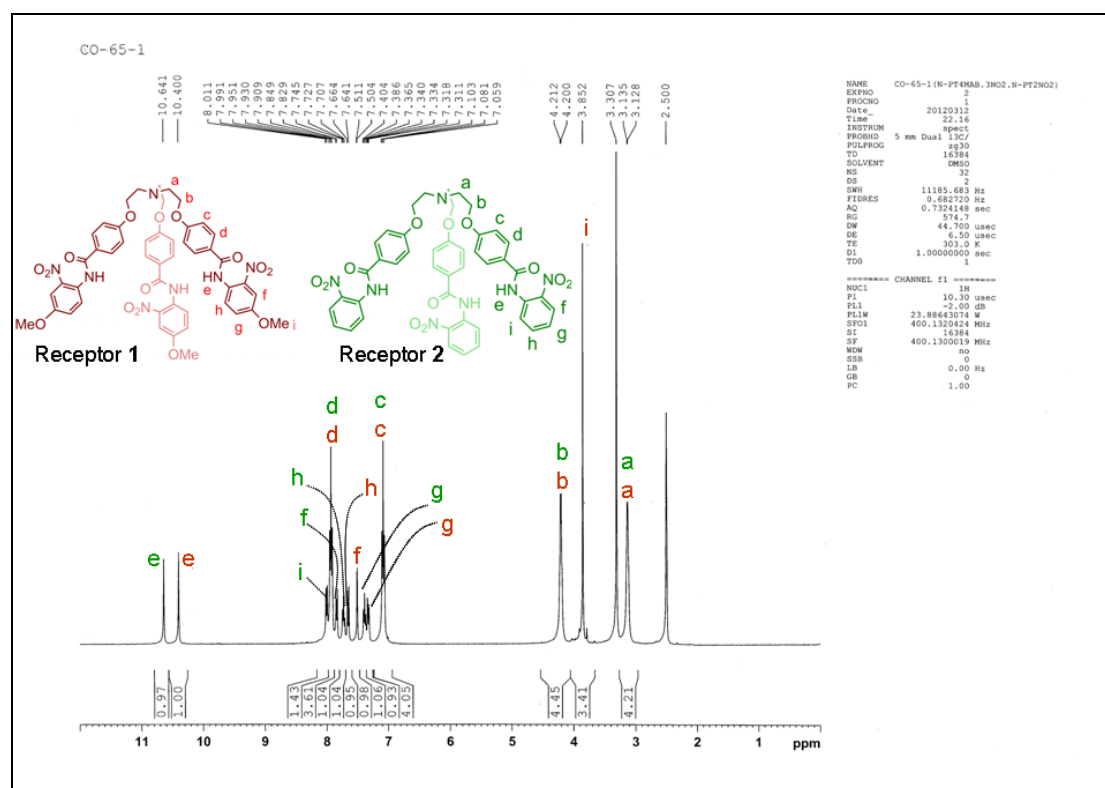

**Fig. S31** <sup>1</sup>H NMR (400 MHz, DMSO-*d*<sub>6</sub>, 30 °C) spectrum of the mixture of receptors **1** and **2** (in 1:1 ratio, [c] = 6.25 mM).

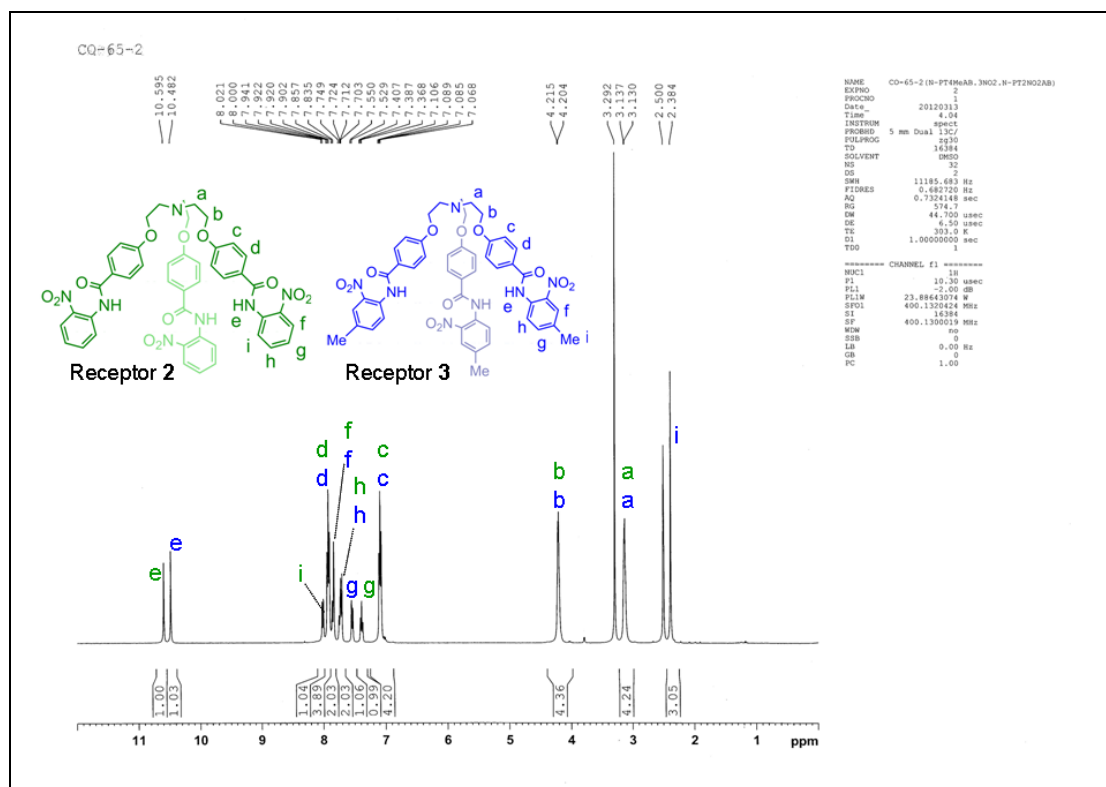

**Fig. S32**  $^1\text{H}$  NMR (400 MHz,  $\text{DMSO-}d_6$ , 30 °C) spectrum of the mixture of receptors 2 and 3 (in 1:1 ratio,  $[c] = 6.25$  mM).

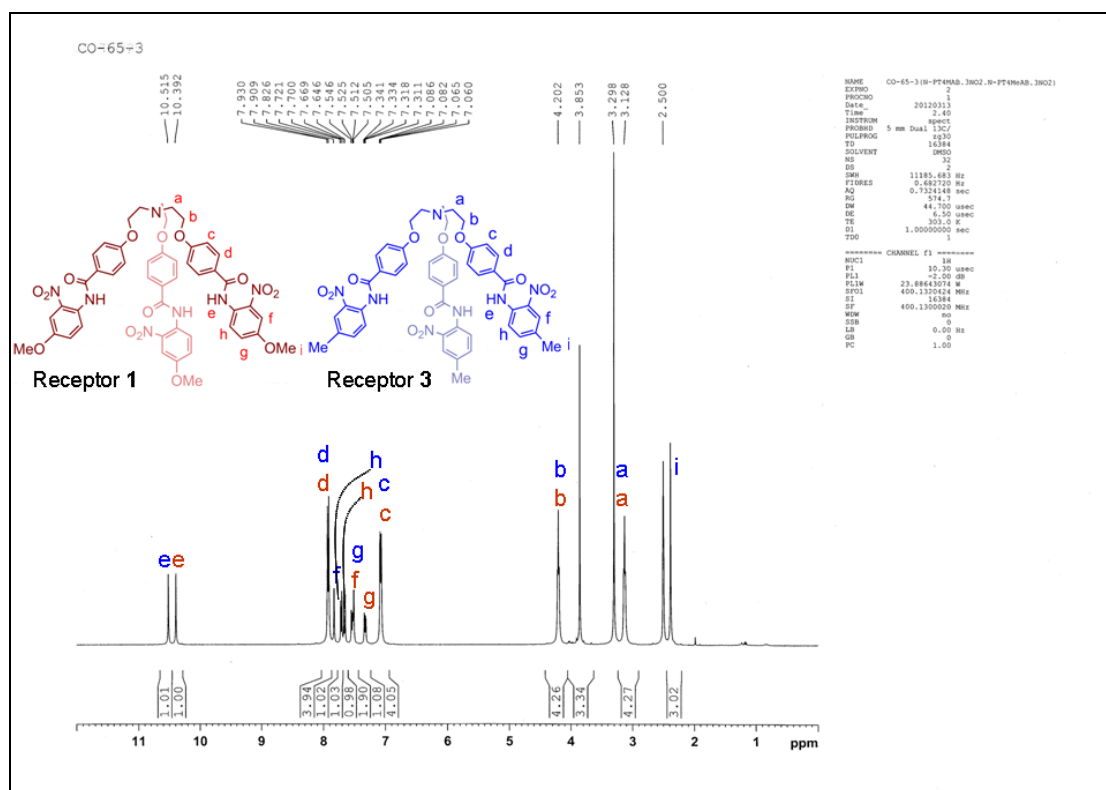

**Fig. S33**  $^1\text{H}$  NMR (400 MHz,  $\text{DMSO-}d_6$ , 30 °C) spectrum of the mixture of receptors 1 and 3 (in 1:1 ratio,  $[c] = 6.25$  mM).

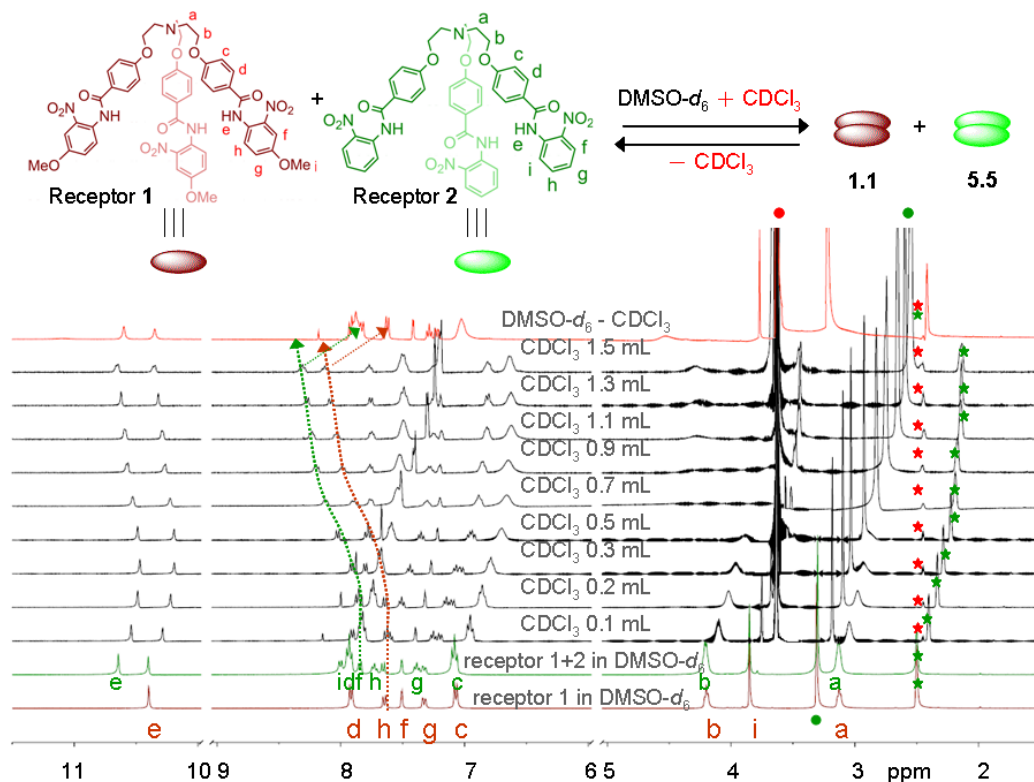

**Fig. S34** Two-component self-sorting:  $^1\text{H}$  NMR (400 MHz, 30 °C) titration spectra of receptors **1** and **2** in a 1:1 ratio (6.25 mM each) in a  $\text{DMSO-}d_6$  solution upon addition of varying amount of  $\text{CDCl}_3$ . After partial evaporation of  $\text{CDCl}_3$ , the resulting spectra (in red color) merged to the original one recorded in  $\text{DMSO-}d_6$ . Star marks in green and red colors in spectra represent peaks for  $\text{DMSO-}d_6$  solvent and from internal reference in TMS, respectively. Circle marks in green and red colors represent the residual water peaks from deuterated solvents.

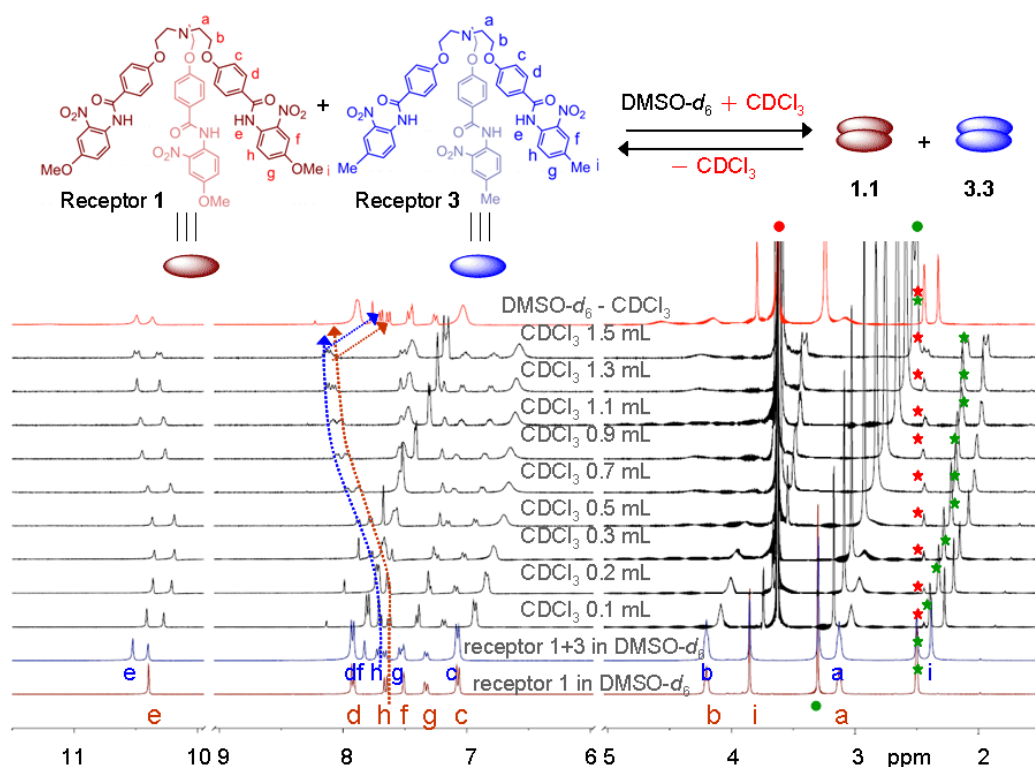

**Fig. S35**  $^1\text{H}$  NMR (400 MHz, 30 °C) titration spectra of receptors **1** and **3** (in 1:1 ratio, 6.25 mM each) in a  $\text{DMSO-}d_6$  solution upon addition of varying amount of  $\text{CDCl}_3$ . After partial evaporation of  $\text{CDCl}_3$  the resulting spectrum (in red color) merged to the original one recorded in  $\text{DMSO-}d_6$ . Star marks in green and red colors in all spectra represent peaks for  $\text{DMSO-}d_6$  solvent and from internal reference in TMS, respectively. Circle marks in green and red colors represent the residual water peaks from deuterated solvents.

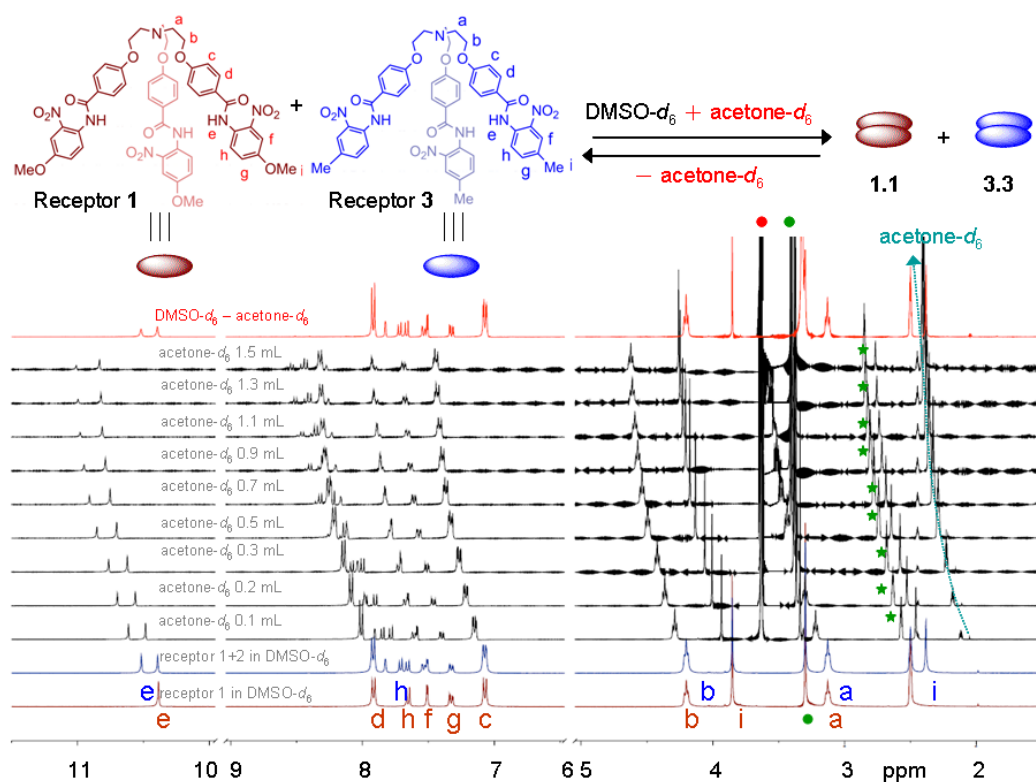

**Fig. S36**  $^1\text{H}$  NMR (400 MHz, 30 °C) titration spectra of receptors **1** and **3** (in 1:1 ratio, 6.25 mM each) in a  $\text{DMSO-}d_6$  solution upon addition of varying amount of  $\text{acetone-}d_6$ . After partial evaporation of  $\text{acetone-}d_6$  the resulting spectrum (in red color) merged to the original one recorded in  $\text{DMSO-}d_6$ . Star marks in green and red colors in all spectra represent peaks for  $\text{DMSO-}d_6$  solvent and from internal reference in TMS, respectively. Circle marks in green and red colors represent the residual water peaks from deuterated solvents.



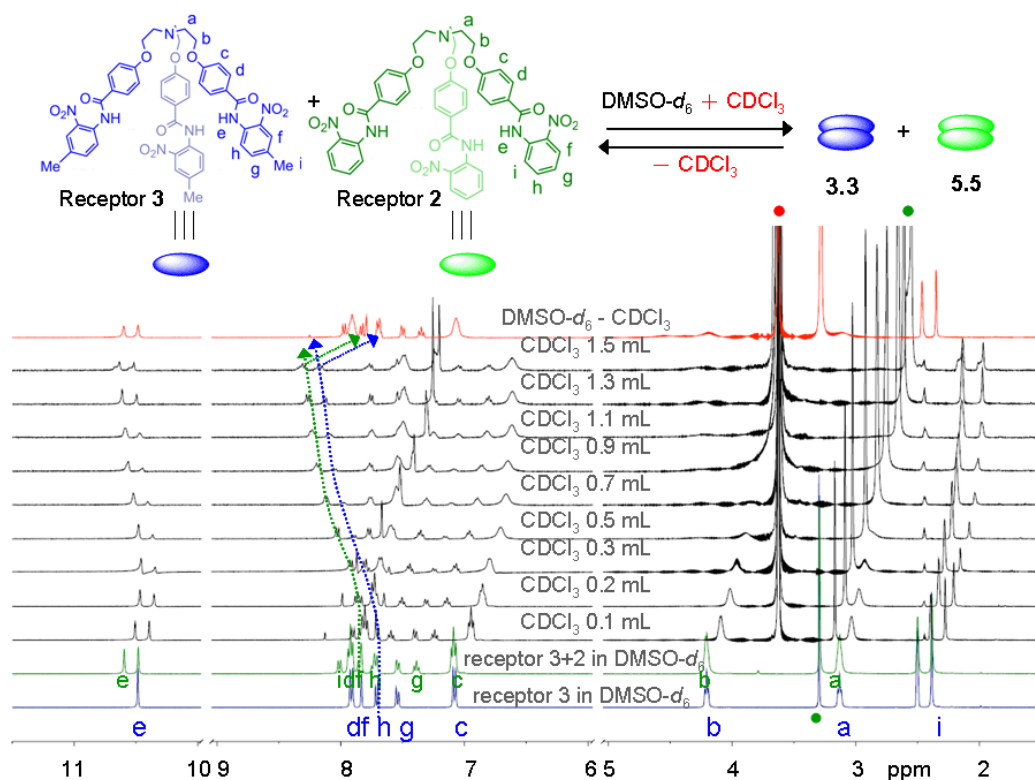

**Fig. S37**  $^1\text{H}$  NMR (400 MHz, 30 °C) titration spectra of receptors **2** and **3** (in 1:1 ratio, 6.25 mM each) in a  $\text{DMSO-}d_6$  solution upon addition of varying amount of  $\text{CDCl}_3$ . After partial evaporation of  $\text{CDCl}_3$  the resulting spectrum (in red color) merged to the original one recorded in  $\text{DMSO-}d_6$ . Star marks in green and red colors in all spectra represent peaks for  $\text{DMSO-}d_6$  solvent and from internal reference in TMS, respectively. Circle marks in green and red colors represent the residual water peaks from deuterated solvents.

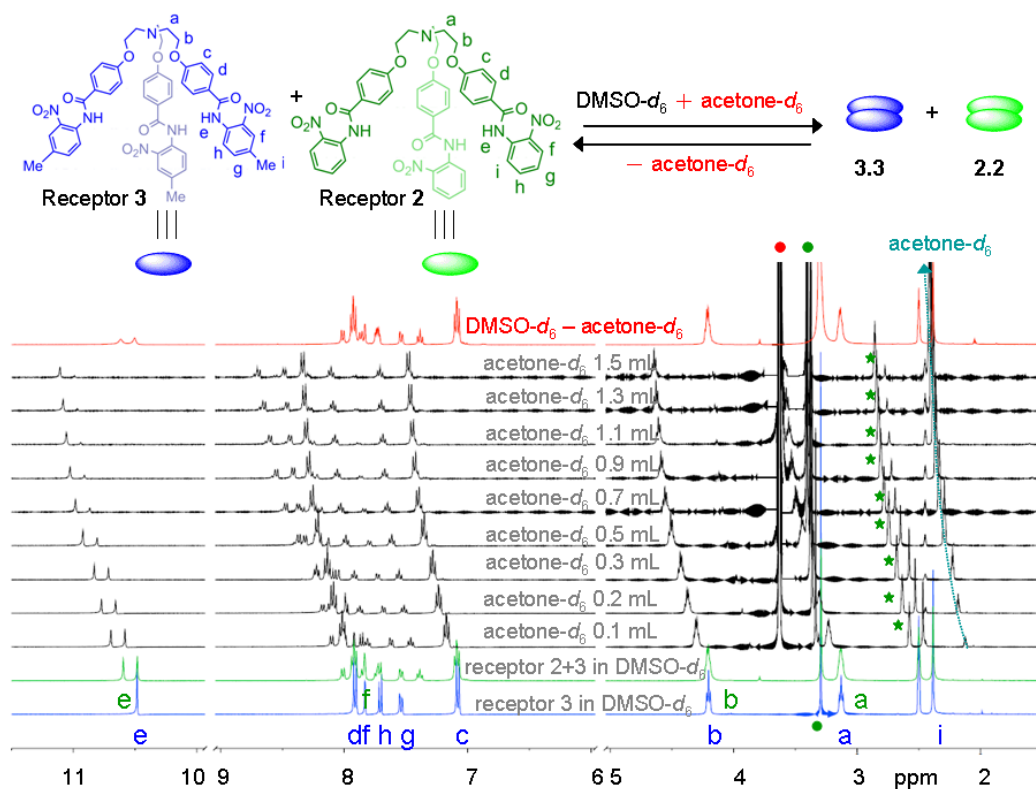

**Fig. S38**  $^1\text{H}$  NMR (400 MHz, 30 °C) titration spectra of receptors **2** and **3** (in 1:1 ratio, 6.25 mM each) in a  $\text{DMSO-}d_6$  solution upon addition of varying amount of  $\text{acetone-}d_6$ . After partial evaporation of  $\text{acetone-}d_6$  the resulting spectrum (in red color) merged to the original one recorded in  $\text{DMSO-}d_6$ . Star marks in green and red colors in all spectra represent peaks for  $\text{DMSO-}d_6$  solvent and from internal reference in TMS, respectively. Circle marks in green and red colors represent the residual water peaks from deuterated solvents.

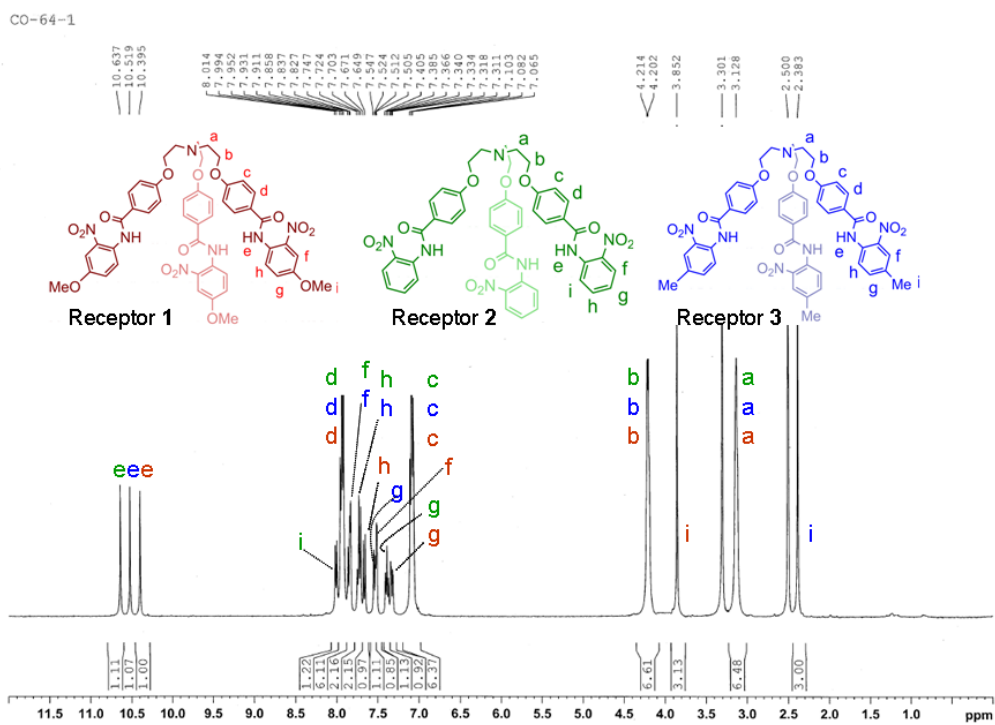

**Fig. S39**  $^1\text{H}$  NMR ( $\text{DMSO-}d_6$ , 400 MHz, 30 °C) spectrum of receptors **1**, **2** and **3** (in 1:1:1 ratio, 6.25 mM each).

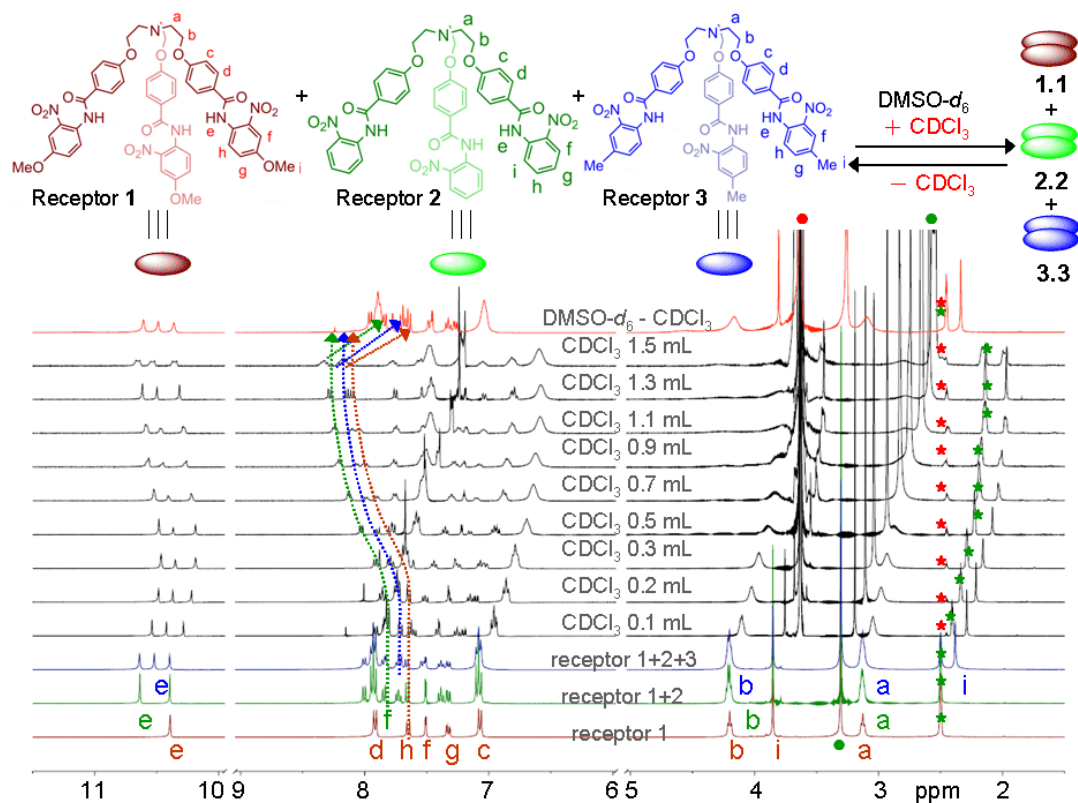

**Fig. S40** Three-component self-sorting:  $^1H$  NMR (400 MHz, 30 °C) titration spectra of receptors **1**, **2** and **3** (in a 1:1:1 ratio, 6.25 mM each) in a DMSO- $d_6$  solution upon addition of varying amount of  $CDCl_3$ . After partial evaporation of  $CDCl_3$  the resulting spectra (in red color) merged to the original one recorded in DMSO- $d_6$ . Star marks in green and red colors in spectra represent peaks for DMSO- $d_6$  solvent and from internal reference in TMS, respectively. Circle marks in green and red colors represent the residual water peaks from deuterated solvents.

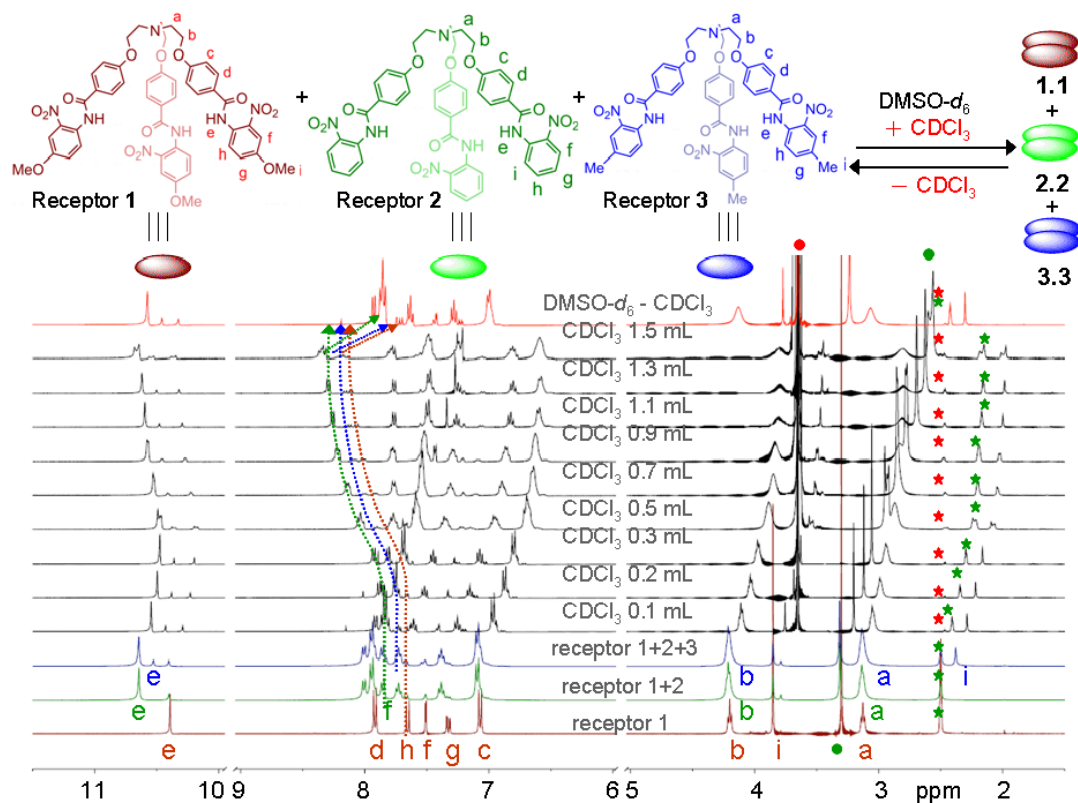

**Fig. S41**  $^1\text{H}$  NMR (400 MHz, 30 °C) titration spectra of receptors **1**, **2** and **3** (in 1:5:1 ratio, 6.25 mM for receptors **1** and **3**) in a  $\text{DMSO-}d_6$  solution upon addition of varying amount of  $\text{CDCl}_3$ . After partial evaporation of  $\text{CDCl}_3$  the resulting spectrum (in red color) merged to the original one recorded in  $\text{DMSO-}d_6$ . Star marks in green and red colors in all spectra represent peaks for  $\text{DMSO-}d_6$  solvent and from internal reference in TMS, respectively. Circle marks in green and red colors represent the residual water peaks from deuterated solvents.

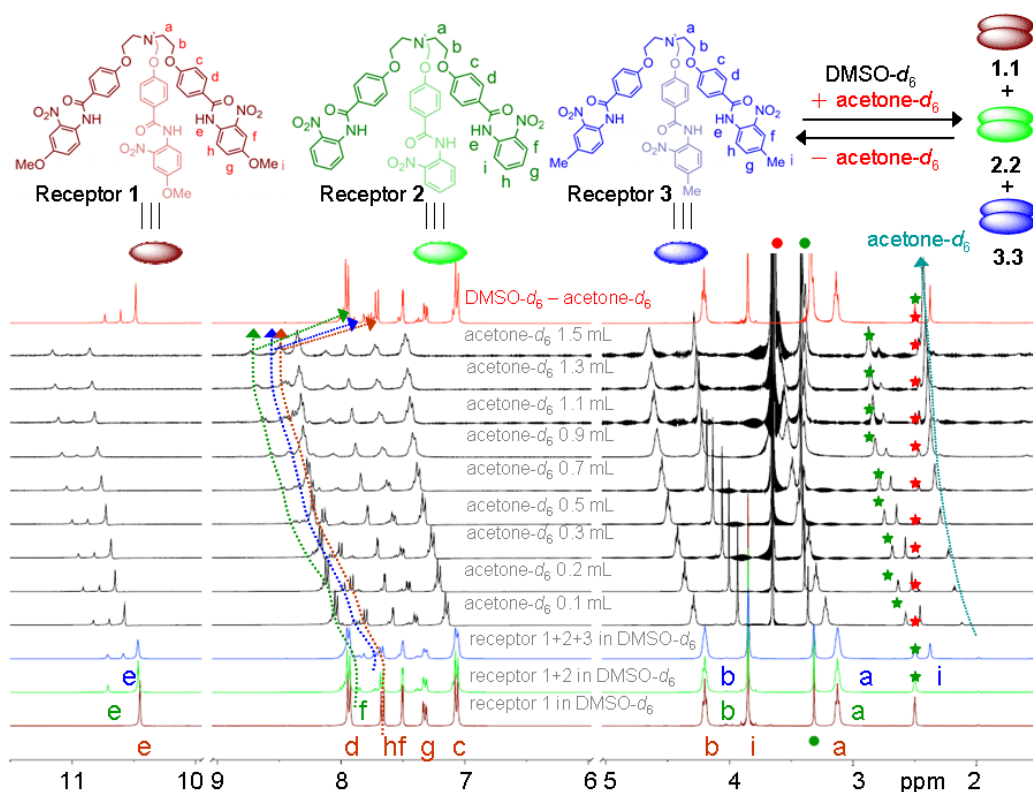

**Fig. S42**  $^1\text{H}$  NMR (400 MHz, 30 °C) titration spectra of receptors **1**, **2** and **3** (in 5:1:1 ratio, 6.25 mM for receptors **2** and **3**) in a  $\text{DMSO-}d_6$  solution upon addition of varying amount of  $\text{acetone-}d_6$ . After partial evaporation of  $\text{acetone-}d_6$  the resulting spectrum (in red color) merged to the original one recorded in  $\text{DMSO-}d_6$ . Star marks in green and red colors in all spectra represent peaks for  $\text{DMSO-}d_6$  solvent and from internal reference in TMS, respectively. Circle marks in green and red colors represent the residual water peaks from deuterated solvents.

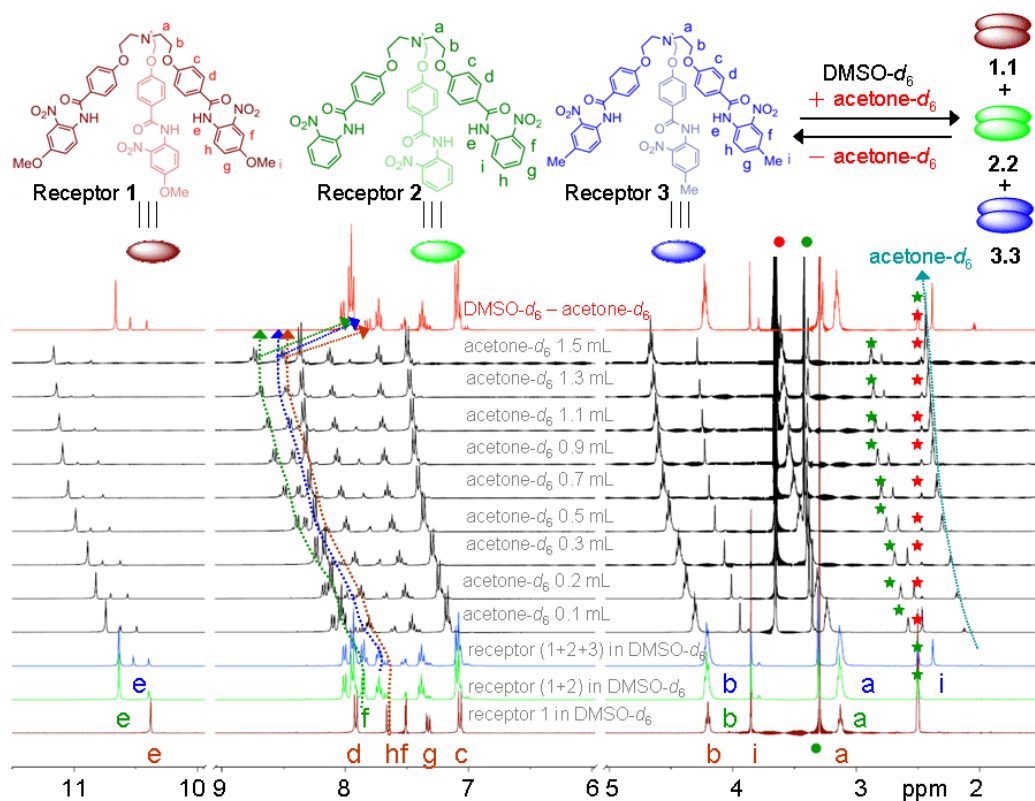

**Fig. S43**  $^1\text{H}$  NMR (400 MHz, 30 °C) titration spectra of receptor **1**, **2** and **3** (in 1:5:1 ratio, 6.25 mM for receptors **1** and **3**) in a  $\text{DMSO-}d_6$  solution upon addition of varying amount of  $\text{acetone-}d_6$  respectively. After partial evaporation of  $\text{acetone-}d_6$  the resulting spectra (in red color) merged to the original one recorded in  $\text{DMSO-}d_6$ . Star marks in green and red colors in all spectra represent peaks for  $\text{DMSO-}d_6$  solvent and from internal reference in TMS, respectively. Circle marks in green and red colors represent the residual water peaks from deuterated solvents.
